# Supplementary material for: Modification of Gene Duplicability during the Evolution of Protein Interaction Network
Source: PLoS Comput Biol. 2011 Apr 7;7(4):e1002029. doi: 10.1371/journal.pcbi.1002029 (PMC3072358; doi:10.1371/journal.pcbi.1002029)
Supplement: Table S3 — Connectivity, centrality, time of origin and conservation of genes in the four species. (A) Network properties of genes that originated at each time in evolution are compared with those of genes that originated earlier and later in evolution. The distribution of degree and betweenness of younger and older genes are compared using the Wilcoxon Test and with 100,000 randomizations of subsets of 500 proteins in order to eliminate eventual biases due to the comparison of groups with different numbers of genes. P-values and Z-scores <0.05 are reported in bold (green for depletion, red for enrichment). NA = not available. (B) Network properties of genes that have a certain level of conservation are compared with more and less conserved genes. Conservation is calculated on the basis of the number of internal nodes where no orthologs of each gene are found. The distribution of degree and betweenness of more and less conserved genes are compared using the Wilcoxon Test and with 100,000 randomizations of subsets of 500 proteins, as in (A). (XLS) [file pcbi.1002029.s007.xls]

## Sheet: Table S3A
Table S3A: Connectivity, centrality, and time of origin of genes in the four species
Legend: Network properties of genes that originated at each time in evolution are compared with those of genes that originated earlier and later in evolution. The distribution of degree and betweeness of younger and older genes are compared using the Wilcoxon Test and with 100,000 randomizations of subsets of 500 proteins in order to eliminate eventual biases due to the comparison of groups with …
Network	Species	Considered Category						Comparison with genes that originated later (vs younger genes)									Comparison with genes that originated earlier (vs older genes)
		Origin	N genes	Degree		Betweenness		N genes	Degree		Betweenness		Wilcoxon Test		Randomization		N genes	Degree		Betweenness		Wilcoxon Test		Randomization
				Mean	Median	Mean	Median		Mean	Median	Mean	Median	p-value degree	p-value betweenness	z-score degree	z-score betweenness		Mean	Median	Mean	Median	p-value degree	p-value betweenness	z-score degree	z-score betweenness
Total Network	H. sapiens	LUCA	3248	12.2183	5	17898	1163.27	3878	10.6191	4	15356.7	780.229	0.000184111	8.20352e-05	0.12865	0.28743	NA	NA	NA	NA	NA	NA	NA	NA	NA
		Eukaryotes	3247	12.579	5	19795.2	1205.79	3878	10.6191	4	15356.7	780.229	4.73817e-07	0.00094365	0.09848	0.23749	3248	12.2183	5	17898	1163.27	0.22546	0.552277	0.58459	0.58905
		Opisthokonts	178	9.44382	5	9352.35	1189.02	3700	10.6757	4	15645.5	758.018	0.0910659	0.8	0.73273	0.86803	6495	12.3986	5	18846.5	1179.82	0.8	0.231068	0.06558	0.04987
		Metazoans	1399	13.2588	5	21442.5	1027.48	2301	9.10517	4	12120.9	605.258	1.52873e-10	0.00559442	0.00194	0.03067	6673	12.3198	5	18593.2	1179.82	0.402519	0.379106	0.72224	0.7034
		Vertebrates	1683	10.0255	4	14037	785.923	618	6.59871	3	6902.84	296.026	4.20733e-05	0.00132721	5e-05	0.00285	8072	12.4825	5	19087.1	1153.81	5.62272e-08	0.00459306	0.04695	0.16563
		Mammals	534	6.52434	3	7034.85	269.604	84	7.07143	4	6063.64	462.158	0.309579	0.678244	0.65881	0.40296	9755	12.0586	5	18215.8	1066.36	2.10042e-13	1.11464e-06	0.01002	0.05984
		Primates	84	7.07143	4	6063.64	462.158	NA	NA	NA	NA	NA	NA	NA	NA	NA	10289	11.7714	5	17635.5	999.684	0.071629	0.140766	0.01989	0.01956
	D. melanogaster	LUCA	2425	11.9311	5	18323.9	1259.48	1618	13.6236	5.5	23075.4	1418.2	0.152918	0.0579555	0.89924	0.85328	NA	NA	NA	NA	NA	NA	NA	NA	NA
		Eukaryotes	2255	13.6785	6	20407.7	1808.84	1618	13.6236	5.5	23075.4	1418.2	0.120897	0.8	0.48023	0.71218	2425	11.9311	5	18323.9	1259.48	0.000871715	0.0469861	0.92191	0.7331
		Opisthokonts	84	17	6.5	39328.5	3220.88	1534	13.4387	5	22185.4	1370.08	0.138448	0.0197416	0.18467	0.15373	4680	12.7731	6	19328	1469.99	0.153811	0.0127842	0.87353	0.91274
		Metazoans	1001	14.4256	6	24751.9	1833.3	533	11.5854	5	17365.2	810.413	5.1947e-06	0.00303356	0.02121	0.05652	4764	12.8476	6	19680.6	1478.53	0.0317818	0.052555	0.86801	0.84954
		Insects	533	11.5854	5	17365.2	810.413	NA	NA	NA	NA	NA	NA	NA	NA	NA	5765	13.1216	6	20561.2	1529.33	3.67892e-05	0.0268744	0.11419	0.19554
	S. cerevisiae	LUCA	2433	38.5249	20	7758.58	1333	111	17.3153	8	2583.86	440.667	3.05527e-09	0.000268506	0	0.00461	NA	NA	NA	NA	NA	NA	NA	NA	NA
		Eukaryotes	2688	30.6897	18	5906.3	1188.04	111	17.3153	8	2583.86	440.667	9.69335e-08	0.000944782	0.00066	0.03506	2433	38.5249	20	7758.58	1333	0.00188735	0.103381	0.11136	0.30046
		Opisthokonts	6	8	5	537.73	91.8264	105	17.8476	8	2700.79	463.599	0.261211	0.22937	0.84696	0.88378	5121	34.4122	19	6786.32	1249.79	0.0205351	0.0616447	0.0186	0.02881
		Fungi	105	17.8476	8	2700.79	463.599	NA	NA	NA	NA	NA	NA	NA	NA	NA	5127	34.3813	19	6779.01	1248.16	1.30137e-07	0.0015666	0.00032	0.02066
	E. coli	LUCA	2136	12.6985	5	3954.81	384.541	703	6.27738	4	1153.59	115.883	9.3989e-12	1.81981e-08	0	0	NA	NA	NA	NA	NA	NA	NA	NA	NA
		Bacteria	703	6.27738	4	1153.59	115.883	NA	NA	NA	NA	NA	NA	NA	NA	NA	2136	12.6985	5	3954.81	384.541	9.3989e-12	1.81981e-08	0	0
Golden set	H. sapiens	LUCA	2482	8.86745	4	15947.8	709.877	3099	8.40561	4	13015.2	708.483	0.159126	0.145784	0.33086	0.24038	NA	NA	NA	NA	NA	NA	NA	NA	NA
		Eukaryotes	2470	8.86721	4	13992.1	591.858	3099	8.40561	4	13015.2	708.483	0.561524	0.685563	0.32036	0.38033	2482	8.86745	4	15947.8	709.877	0.0602758	0.0708479	0.50236	0.32057
		Opisthokonts	146	7.45205	4	9561.28	566.827	2953	8.45276	4	13186	712.825	0.8	0.554222	0.72199	0.71876	4952	8.86733	4	14972.3	646.963	0.8	0.465086	0.20361	0.19115
		Metazoans	1115	10.191	5	15940	895.604	1838	7.39826	4	11515.3	576.039	1.21191e-06	0.0799653	0.00437	0.13005	5098	8.82679	4	14817.4	644.721	0.000190715	0.357977	0.89994	0.62816
		Vertebrates	1355	8.10258	4	13331.5	782.135	483	5.42236	3	6420	182.002	6.90726e-05	0.000979558	9e-05	0.0038	6213	9.07162	4	15018.8	684.677	0.388755	0.920093	0.18298	0.33449
		Mammals	414	5.46377	3	6603.52	181.761	69	5.17391	3	5318.88	190.399	0.544729	0.972338	0.40434	0.35361	7568	8.89812	4	14716.7	701.624	1.67297e-05	0.000763715	0.03686	0.10634
		Primates	69	5.17391	3	5318.88	190.399	NA	NA	NA	NA	NA	NA	NA	NA	NA	7982	8.71999	4	14295.9	664.143	0.0236096	0.219949	0.02364	0.03967
	S. cerevisiae	LUCA	1690	11.0911	5	6708.25	1015.99	70	6.8	3	3225.28	80.7866	0.0208463	0.00313467	0.01268	0.04223	NA	NA	NA	NA	NA	NA	NA	NA	NA
		Eukaryotes	1998	11.8268	7	6131.42	1123.92	70	6.8	3	3225.28	80.7866	0.000108724	0.0148806	0.00397	0.08115	1690	11.0911	5	6708.25	1015.99	3.10871e-06	0.0205878	0.61676	0.4077
		Opisthokonts	4	1.75	1	430.525	0	66	7.10606	3	3394.66	133.401	0.0564056	0.699059	0.93994	0.82969	3688	11.4897	6	6395.75	1070.7	0.0197329	0.8	0.01233	0.06941
		Fungi	66	7.10606	3	3394.66	133.401	NA	NA	NA	NA	NA	NA	NA	NA	NA	3692	11.4791	6	6389.29	1067.54	0.00692923	0.00716442	0.01362	0.08149

## Sheet: Table S3B
Table S3B: Connectivity, centrality, and conservation of genes in the four species
Legend: Conservation is calculated on the basis of the number of internal nodes where no orthologs of each gene are found.The distribution of degree and betweeness of more and less conserved genes are compared using the Wilcoxon Test and with 100,000 randomizations of subsets of 500 proteins in order to eliminate eventual biases due to the comparison of groups with different numbers of genes P-va…
Network	Species	Considered Category						Comparison with less conserved genes									Comparison with more conserved genes
		Conservation	N genes	Degree		Betweenness		N genes	Degree		Betweenness		Wilcoxon Test		Randomization		N genes	Degree		Betweenness		Wilcoxon Test		Randomization
				Mean	Median	Mean	Median		Mean	Median	Mean	Median	p-value degree	p-value betweenness	z-score degree	z-score betweenness		Mean	Median	Mean	Median	p-value degree	p-value betweenness	z-score degree	z-score betweenness
Total Network	H. sapiens	0	7248	11.9099	5	17594	1093.01	3125	11.3238	4	17420.8	837.347	2.58638e-05	0.010641	0.34531	0.49111	NA	NA	NA	NA	NA	NA	NA	NA	NA
		1	1926	10.852	5	16348.1	951.318	1199	12.0817	4	19144	613.526	0.144008	0.436081	0.77264	0.68432	7248	11.9099	5	17594	1093.01	0.00548361	0.0781527	0.23513	0.40888
		2	873	13.1501	5	22832.3	921.004	326	9.22086	3	9266.87	258.079	0.0014738	0.00260271	0.01637	0.00615	9174	11.6878	5	17332.4	1061.76	0.1694	0.774555	0.74805	0.76554
		3	287	9.25784	3	9394.61	246.381	39	8.94872	4	8326.87	348.826	0.823236	0.492352	0.45376	0.42306	10047	11.8149	5	17810.3	1039.56	1.49707e-05	0.000398064	0.28985	0.26224
		4	39	8.94872	4	8326.87	348.826	NA	NA	NA	NA	NA	NA	NA	NA	NA	10334	11.7439	5	17576.6	997.903	0.162881	0.419957	0.2728	0.22341
	D. melanogaster	0	3861	13.4144	6	21987.9	1653.78	2437	12.3217	5	17601.8	1147.65	0.00327717	0.000360084	0.19551	0.12794	NA	NA	NA	NA	NA	NA	NA	NA	NA
		1	843	12.4555	6	17836.7	1404.2	1594	12.2509	5	17477.6	1011.27	0.162662	0.0437107	0.43256	0.46323	3861	13.4144	6	21987.9	1653.78	0.326176	0.326819	0.22771	0.146
		2	418	12.7608	6	19139.3	1293.93	1176	12.0697	5	16886.9	889.415	0.190935	0.00611262	0.3059	0.26852	4704	13.2426	6	21244	1582.88	0.487279	0.947085	0.36767	0.31378
		3	923	12.3521	5	16994.7	1040.84	253	11.0395	4	16493.7	476.288	0.10017	0.132937	0.21556	0.45337	5122	13.2032	6	21072.2	1565.32	0.0251483	0.000256456	0.31978	0.21613
		4	253	11.0395	4	16493.7	476.288	NA	NA	NA	NA	NA	NA	NA	NA	NA	6045	13.0733	6	20449.6	1498.08	0.00318125	0.000610585	0.11788	0.22078
	S. cerevisiae	0	3702	39.1686	22	7945.29	1576.19	1530	21.6634	12	3677.19	627.285	1.24066e-46	3.52673e-31	0	0.0048	NA	NA	NA	NA	NA	NA	NA	NA	NA
		1	82	24.9512	12.5	3800.13	558.57	1448	21.4772	12	3670.22	627.285	0.533083	0.7116	0.223	0.3876	3702	39.1686	22	7945.29	1576.19	0.00121848	0.000953092	0.01205	0.09173
		2	245	25.2816	11	6874.46	571.875	1203	20.7024	12	3017.66	632.717	0.572302	0.614351	0.06384	0.03895	3784	38.8605	22	7855.47	1541.14	2.01708e-11	7.05218e-08	0.00061	0.39374
		3	1176	20.8444	13	3030.15	650.362	27	14.5185	4	2473.71	141.072	0.00132341	0.0773244	0.1714	0.42318	4029	38.0347	21	7795.81	1475.86	5.26594e-32	4.19263e-21	0.0377	0.14992
		4	27	14.5185	4	2473.71	141.072	NA	NA	NA	NA	NA	NA	NA	NA	NA	5205	34.1508	19	6719.07	1239.37	1.74096e-05	0.00645678	0.01685	0.146
	E. coli	0	1584	12.4766	5	4207.26	314.212	1255	9.38167	5	2067.06	259.699	0.496793	0.369449	0.02605	0.02536	NA	NA	NA	NA	NA	NA	NA	NA	NA
		1	153	11.6471	6	2475.41	730.945	1102	9.06715	4	2010.36	216.813	0.0013736	0.0111711	0.0982	0.19744	1584	12.4766	5	4207.26	314.212	0.0102374	0.0585653	0.4261	0.30116
		2	134	11.8955	5	2800.37	384.1	968	8.67562	4	1901	182.898	0.0881399	0.108257	0.05998	0.09329	1737	12.4036	5	4054.71	343.933	0.511254	0.590643	0.47336	0.43619
		3	401	8.52369	4	1761.78	249.682	567	8.78307	4	1999.46	141.188	0.440489	0.655999	0.60114	0.7685	1871	12.3672	5	3964.88	358.207	0.166973	0.117376	0.0082	0.0072
		4	567	8.78307	4	1999.46	141.188	NA	NA	NA	NA	NA	NA	NA	NA	NA	2272	11.6888	5	3576.04	334.473	0.0217574	0.0492014	0.01864	0.04836
Golden Set	H. sapiens	0	5689	8.74917	4	14237	710.913	2362	8.54615	3.5	14175.6	579.912	0.00321132	0.987827	0.42172	0.48905	NA	NA	NA	NA	NA	NA	NA	NA	NA
		1	1473	7.97488	4	12442.6	694.755	889	9.49269	3	17047.1	468.02	0.891505	0.555689	0.90807	0.83737	5689	8.74917	4	14237	710.913	0.0151744	0.762424	0.21489	0.30968
		2	663	10.0483	4	19559	565.699	226	7.86283	3	9678.06	221.848	0.0389807	0.0244611	0.10613	0.06184	7162	8.58992	4	13867.9	709.418	0.656278	0.494324	0.78669	0.75757
		3	201	8.16915	3	10405	200.443	25	5.4	4	3833.63	531.202	0.568262	0.74054	0.20105	0.15591	7825	8.71348	4	14350.1	685.184	0.00731928	0.051215	0.45329	0.41814
		4	25	5.4	4	3833.63	531.202	NA	NA	NA	NA	NA	NA	NA	NA	NA	8026	8.69985	4	14251.3	659.337	0.65797	0.219455	0.13252	0.07892
	S. cerevisiae	0	2783	12.8556	7	7407.48	1469.15	975	7.25436	4	3280.28	338.797	1.32828e-26	2.56022e-18	0	0	NA	NA	NA	NA	NA	NA	NA	NA	NA
		1	48	6.75	3	4381.34	434.229	927	7.28047	4	3223.27	334.207	0.294416	0.246561	0.60892	0.28221	2783	12.8556	7	7407.48	1469.15	0.000468	0.259709	0.00657	0.16867
		2	137	5.75912	2	4313.29	27.4044	790	7.5443	4	3034.24	386.857	0.000157569	0.671945	0.94342	0.1373	2831	12.752	7	7356.17	1452.14	5.94247e-13	0.00496537	0	0.05112
		3	781	7.54161	4	2973.31	396.055	9	7.77778	2	8321.37	0	0.109792	0.972081	0.4994	0.7447	2968	12.4292	6	7215.71	1326.85	5.00267e-14	1.3771e-16	0.2006	0.22488
		4	9	7.77778	2	8321.37	0	NA	NA	NA	NA	NA	NA	NA	NA	NA	3749	11.411	6	6331.93	1049.79	0.0465158	0.721413	0.28387	0.59743
