# Supplementary material for: Modification of Gene Duplicability during the Evolution of Protein Interaction Network
Source: PLoS Comput Biol. 2011 Apr 7;7(4):e1002029. doi: 10.1371/journal.pcbi.1002029 (PMC3072358; doi:10.1371/journal.pcbi.1002029)
Supplement: Table S4 — Orthology relationship between ancient singleton hubs. In each species, the orthologs of singleton hubs that originated early in evolution (LUCA and Eukaryotes) and with network information in at least one of the other model species are extracted. Then the number of hubs that have at least one ortholog that is also hub in its protein interaction network is calculated. (XLS) [file pcbi.1002029.s008.xls]

## Sheet: Table S4
Table S4: Orthology relationship between ancient singleton hubs
Legend: In each species, the orthologs of singleton hubs that originated early in evolution (LUCA and Eukaryotes) and with network information in at least one of the other model species are extracted. Then the number of hubs that have at least one ortholog that is also hub in its protein interaction network is calculated.
		Hs	Dm	Sc	Ec
LUCA	Singleton Hubs	226	258	386	348
	Hubs with Orthologs in Networks	169	194	287	188
	Orthologous Hubs (%)	76 (45)	99 (51)	113 (39)	93 (49)
Eukaryotes	Singleton Hubs	235	305	500	NA
	Hubs with Orthologs in Networks	212	227	277	NA
	Orthologous Hubs (%)	117 (55)	113 (50)	137 (49)	NA
Total	Singleton Hubs	461	563	886	348
	Hubs with Orthologs in Networks	381	427	564	188
	Orthologous Hubs (%)	193 (51)	212 (50)	250 (44)	93 (49)
