# Supplementary material for: Modification of Gene Duplicability during the Evolution of Protein Interaction Network
Source: PLoS Comput Biol. 2011 Apr 7;7(4):e1002029. doi: 10.1371/journal.pcbi.1002029 (PMC3072358; doi:10.1371/journal.pcbi.1002029)
Supplement: Table S6 — Functional analysis. Three functional comparisons are performed on the basis of the terms at levels 5 and 6 of the biological process branch of GO: (A) Comparison between recent duplicated hubs and ancestral singleton hubs, (B) recent and ancestral genes, and (C) duplicated and singleton genes. Recent genes originated with metazoans or vertebrates; ancestral genes originated with LUCA or eukaryotes. (XLS) [file pcbi.1002029.s010.xls]

## Sheet: Legend
Table S6: Functional analysis
The following information is reported for each table:
Process:	Manually-defined functional category (based on the GO description)
GO level:	Number of internal branches of the 'biological process' subtree of the GO
GO description:	Description of the original GO term
GO ID:	Identifier of the original GO term
N genes (list1):	Number of genes from list 1 present in the GO term. What list1 represents is specified in each table
N genes (list 2):	Number of genes from list 2 present in the GO term. What list2 represents is specified in each table
% of total genes (list 1):	Genes from list 1 that are present in the GO term / total genes from list 1 that are present in GO *100
% of total genes (list 2):	Genes from list 2 that are present in the GO term / total genes from list 2 that are present in GO *100
p-value:	as determined with Fisher's exact test
adjusted p-value:	adjustment for the False Discovery Rate (FDR), using Benjamini-Hochberg method
Enriched list:	Direction of the enrichment. 1 = list1; 2 = list2

## Sheet: hubs
Table S6A: Comparison between recent duplicated hubs and ancestral singleton hubs
List 1: recent duplicated hubs
List 2: ancestral singleton hubs
Recent genes: genes that originated with metazoans and vertebrates
Ancestral genes: genes that originated with LUCA and eukaryotes
Process	GO level	GO description	GO ID	N genes (list 1)	N genes (list 2)	% of total genes (list 1)	% of total genes (list 2)	p-value	adjusted p-value	Enriched list
Cell cycle	5	cell cycle arrest	GO:0007050	12	2	2.75229	0.479616	0.0125353	0.0327008	1
Cell cycle	5	apoptosis	GO:0006915	88	28	20.1835	6.71463	6.80082e-09	9.41652e-08	1
Cell cycle	5	cell development	GO:0048468	60	9	13.7615	2.15827	1.19384e-10	2.68614e-09	1
Cell cycle	5	negative regulation of growth	GO:0045926	16	1	3.66972	0.239808	0.000255313	0.00127656	1
Cell cycle	5	regulation of cell proliferation	GO:0042127	58	13	13.3028	3.11751	3.98993e-08	4.22463e-07	1
Cell cycle	5	cell growth	GO:0016049	21	2	4.81651	0.479616	5.8545e-05	0.000329316	1
Cell cycle	6	M phase	GO:0000279	8	25	1.83486	5.9952	0.00208983	0.00876908	2
Cell cycle	6	regulation of programmed cell death	GO:0043067	72	20	16.5138	4.79616	1.86401e-08	4.43221e-07	1
Cell cycle	6	cell cycle checkpoint	GO:0000075	2	12	0.458716	2.8777	0.00594246	0.0211948	2
Cell motility and interactions	5	taxis	GO:0042330	14	1	3.21101	0.239808	0.00092509	0.00346909	1
Cell motility and interactions	5	regulation of cellular component movement	GO:0051270	25	2	5.73394	0.479616	4.71798e-06	3.39694e-05	1
Cell motility and interactions	5	regulation of cell adhesion	GO:0030155	14	1	3.21101	0.239808	0.00092509	0.00346909	1
Cell motility and interactions	6	chemotaxis	GO:0006935	14	1	3.21101	0.239808	0.00092509	0.00471355	1
Cell motility and interactions	6	cell migration	GO:0016477	39	3	8.94495	0.719424	3.52354e-09	1.0772e-07	1
Cell motility and interactions	6	positive regulation of cellular component movement	GO:0051272	15	1	3.44037	0.239808	0.000487013	0.00281678	1
Cell response to stimuli	6	sensory perception	GO:0007600	20	3	4.58716	0.719424	0.000443507	0.00279149	1
Cell response to stimuli	6	cellular response to hormone stimulus	GO:0032870	15	2	3.44037	0.479616	0.00222476	0.00898301	1
Cell response to stimuli	6	response to peptide hormone stimulus	GO:0043434	14	3	3.21101	0.719424	0.012237	0.0388776	1
Cellular metabolism	5	cellular nitrogen compound biosynthetic process	GO:0044271	1	8	0.229358	1.91847	0.0184443	0.0474283	2
Cellular metabolism	5	macromolecule catabolic process	GO:0043285	29	58	6.65138	13.9089	0.00061813	0.00247252	2
Cellular metabolism	5	cellular macromolecule catabolic process	GO:0044265	17	51	3.89908	12.2302	6.60256e-06	4.57101e-05	2
Cellular metabolism	5	macromolecule biosynthetic process	GO:0043284	136	167	31.1927	40.048	0.00806222	0.022675	2
Cellular metabolism	5	cellular lipid metabolic process	GO:0044255	23	8	5.27523	1.91847	0.00988242	0.0273667	1
Cellular metabolism	6	modification-dependent macromolecule catabolic process	GO:0043632	12	32	2.75229	7.67386	0.00165706	0.00763888	2
Cellular metabolism	6	cellular protein metabolic process	GO:0044267	69	129	15.8257	30.9353	1.7982e-07	3.84814e-06	2
Cellular metabolism	6	steroid metabolic process	GO:0008202	12	2	2.75229	0.479616	0.0125353	0.0388776	1
Cellular processes (not DNA/RNA)	5	establishment of RNA localization	GO:0051236	1	12	0.229358	2.8777	0.0013882	0.00480529	2
Cellular processes (not DNA/RNA)	5	ion transport	GO:0006811	29	7	6.65138	1.67866	0.000264338	0.00128597	1
Cellular processes (not DNA/RNA)	6	endocytosis	GO:0006897	29	5	6.65138	1.19904	3.15959e-05	0.000270461	1
Cellular processes (not DNA/RNA)	6	cation transport	GO:0006812	26	7	5.9633	1.67866	0.00116513	0.00579854	1
Development	5	cell fate commitment	GO:0045165	18	1	4.12844	0.239808	6.93865e-05	0.000367341	1
Development	5	regulation of cell differentiation	GO:0045595	45	6	10.3211	1.43885	1.04399e-08	1.34227e-07	1
Development	5	embryonic morphogenesis	GO:0048598	18	2	4.12844	0.479616	0.000369946	0.00162416	1
Development	5	skeletal system development	GO:0001501	31	2	7.11009	0.479616	9.75413e-08	9.75413e-07	1
Development	5	urogenital system development	GO:0001655	10	1	2.29358	0.239808	0.011429	0.0307048	1
Development	5	immune system development	GO:0002520	26	9	5.9633	2.15827	0.0054192	0.0162576	1
Development	5	nervous system development	GO:0007399	73	15	16.7431	3.59712	7.9097e-11	2.03392e-09	1
Development	5	organ development	GO:0048513	110	21	25.2294	5.03597	2.83751e-17	1.7025e-15	1
Development	5	cellular component morphogenesis	GO:0032989	38	2	8.7156	0.479616	9.35598e-10	1.68408e-08	1
Development	5	anatomical structure formation involved in morphogenesis	GO:0048646	30	5	6.88073	1.19904	1.80006e-05	0.000115718	1
Development	5	positive regulation of developmental process	GO:0051094	55	13	12.6147	3.11751	1.98662e-07	1.88206e-06	1
Development	5	positive regulation of multicellular organismal process	GO:0051240	24	1	5.50459	0.239808	1.29567e-06	1.014e-05	1
Development	5	negative regulation of developmental process	GO:0051093	55	9	12.6147	2.15827	2.4215e-09	3.63225e-08	1
Development	5	regulation of tissue remodeling	GO:0034103	13	1	2.98165	0.239808	0.00174909	0.0058303	1
Development	6	negative regulation of cell differentiation	GO:0045596	20	2	4.58716	0.479616	0.000108758	0.000895158	1
Development	6	positive regulation of cell differentiation	GO:0045597	28	3	6.42202	0.719424	3.74879e-06	4.41812e-05	1
Development	6	neurogenesis	GO:0022008	39	6	8.94495	1.43885	3.66048e-07	7.1213e-06	1
Development	6	central nervous system development	GO:0007417	29	8	6.65138	1.91847	0.000646163	0.00363892	1
Development	6	regulation of nervous system development	GO:0051960	13	1	2.98165	0.239808	0.00174909	0.00763888	1
Development	6	vasculature development	GO:0001944	21	3	4.81651	0.719424	0.000248716	0.0017074	1
Development	6	organ morphogenesis	GO:0009887	59	6	13.5321	1.43885	2.71869e-12	1.93933e-10	1
Development	6	tissue development	GO:0009888	52	5	11.9266	1.19904	2.74675e-11	1.46951e-09	1
Development	6	sensory organ development	GO:0007423	14	1	3.21101	0.239808	0.00092509	0.00471355	1
Development	6	heart development	GO:0007507	21	6	4.81651	1.43885	0.00549138	0.0199179	1
Development	6	muscle organ development	GO:0007517	17	2	3.89908	0.479616	0.000676883	0.00371418	1
Development	6	gland development	GO:0048732	15	1	3.44037	0.239808	0.000487013	0.00281678	1
Development	6	cell morphogenesis	GO:0000902	37	2	8.48624	0.479616	1.82999e-09	6.52698e-08	1
Development	6	cell part morphogenesis	GO:0032990	21	1	4.81651	0.239808	9.59741e-06	9.78021e-05	1
Development	6	regulation of bone remodeling	GO:0046850	13	1	2.98165	0.239808	0.00174909	0.00763888	1
DNA/RNA metabolism and transcription	5	nucleobase, nucleoside, nucleotide and nucleic acid transport	GO:0015931	1	12	0.229358	2.8777	0.0013882	0.00480529	2
DNA/RNA metabolism and transcription	6	DNA metabolic process	GO:0006259	7	76	1.6055	18.2254	4.53981e-18	4.85759e-16	2
DNA/RNA metabolism and transcription	6	ribonucleoprotein complex assembly	GO:0022618	1	11	0.229358	2.63789	0.00267857	0.0104307	2
DNA/RNA metabolism and transcription	6	nucleic acid transport	GO:0050657	1	12	0.229358	2.8777	0.0013882	0.00675168	2
Immune system response	5	inflammatory response	GO:0006954	26	1	5.9633	0.239808	3.37002e-07	2.75729e-06	1
Immune system response	5	positive regulation of immune system process	GO:0002684	13	2	2.98165	0.479616	0.00710508	0.020551	1
Immune system response	6	T cell activation	GO:0042110	12	2	2.75229	0.479616	0.0125353	0.0388776	1
Immune system response	6	B cell activation	GO:0042113	13	2	2.98165	0.479616	0.00710508	0.0241347	1
Immune system response	6	regulation of leukocyte activation	GO:0002694	11	1	2.52294	0.239808	0.00615237	0.0215837	1
Multicellular activities	5	muscle contraction	GO:0006936	15	1	3.44037	0.239808	0.000487013	0.00199233	1
Multicellular activities	5	blood circulation	GO:0008015	16	2	3.66972	0.479616	0.00123115	0.00443213	1
Multicellular activities	5	transmission of nerve impulse	GO:0019226	28	5	6.42202	1.19904	5.51639e-05	0.000320306	1
Multicellular activities	5	cognition	GO:0050890	25	3	5.73394	0.719424	2.3277e-05	0.000139662	1
Multicellular activities	5	wound healing	GO:0042060	18	2	4.12844	0.479616	0.000369946	0.00162416	1
Multicellular activities	5	homeostasis of number of cells	GO:0048872	14	2	3.21101	0.479616	0.00399163	0.0123878	1
Multicellular activities	6	synaptic transmission	GO:0007268	25	5	5.73394	1.19904	0.000283532	0.00183866	1
Regulation of intracellular processes and metabolism	5	regulation of protein localization	GO:0032880	17	2	3.89908	0.479616	0.000676883	0.00264867	1
Regulation of intracellular processes and metabolism	5	regulation of transport	GO:0051049	37	3	8.48624	0.719424	1.28609e-08	1.44685e-07	1
Regulation of intracellular processes and metabolism	5	regulation of biosynthetic process	GO:0009889	145	99	33.2569	23.741	0.00240934	0.00775325	1
Regulation of intracellular processes and metabolism	5	negative regulation of metabolic process	GO:0009892	54	23	12.3853	5.51559	0.000481971	0.00199233	1
Regulation of intracellular processes and metabolism	5	positive regulation of metabolic process	GO:0009893	72	23	16.5138	5.51559	2.1688e-07	1.95192e-06	1
Regulation of intracellular processes and metabolism	5	regulation of cellular metabolic process	GO:0031323	176	119	40.367	28.5372	0.000314087	0.00148778	1
Regulation of intracellular processes and metabolism	5	regulation of nitrogen compound metabolic process	GO:0051171	141	94	32.3394	22.542	0.00164348	0.00558162	1
Regulation of intracellular processes and metabolism	5	regulation of macromolecule metabolic process	GO:0060255	164	117	37.6147	28.0576	0.00352854	0.0111427	1
Regulation of intracellular processes and metabolism	5	positive regulation of cellular process	GO:0048522	125	40	28.6697	9.59233	9.21127e-13	3.31606e-11	1
Regulation of intracellular processes and metabolism	5	negative regulation of cellular process	GO:0048523	116	36	26.6055	8.63309	4.26215e-12	1.27865e-10	1
Regulation of intracellular processes and metabolism	5	negative regulation of cellular component organization	GO:0051129	15	3	3.44037	0.719424	0.00719285	0.020551	1
Regulation of intracellular processes and metabolism	5	regulation of cell activation	GO:0050865	11	1	2.52294	0.239808	0.00615237	0.0181545	1
Regulation of intracellular processes and metabolism	5	cellular homeostasis	GO:0019725	32	6	7.33945	1.43885	1.92167e-05	0.000119276	1
Regulation of intracellular processes and metabolism	5	chemical homeostasis	GO:0048878	37	5	8.48624	1.19904	3.07482e-07	2.63556e-06	1
Regulation of intracellular processes and metabolism	5	negative regulation of catalytic activity	GO:0043086	11	26	2.52294	6.23501	0.0107749	0.0293862	2
Regulation of intracellular processes and metabolism	5	regulation of ligase activity	GO:0051340	1	22	0.229358	5.27578	1.51023e-06	1.13267e-05	2
Regulation of intracellular processes and metabolism	6	positive regulation of transport	GO:0051050	16	1	3.66972	0.239808	0.000255313	0.0017074	1
Regulation of intracellular processes and metabolism	6	negative regulation of transport	GO:0051051	17	1	3.89908	0.239808	0.000133334	0.00101905	1
Regulation of intracellular processes and metabolism	6	negative regulation of biosynthetic process	GO:0009890	38	18	8.7156	4.31655	0.0122386	0.0388776	1
Regulation of intracellular processes and metabolism	6	positive regulation of biosynthetic process	GO:0009891	58	17	13.3028	4.07674	1.52157e-06	2.0351e-05	1
Regulation of intracellular processes and metabolism	6	regulation of cellular biosynthetic process	GO:0031326	143	99	32.7982	23.741	0.00385512	0.0147321	1
Regulation of intracellular processes and metabolism	6	negative regulation of macromolecule metabolic process	GO:0010605	53	23	12.156	5.51559	0.000701762	0.00375443	1
Regulation of intracellular processes and metabolism	6	negative regulation of cellular metabolic process	GO:0031324	48	23	11.0092	5.51559	0.00416339	0.0154494	1
Regulation of intracellular processes and metabolism	6	positive regulation of macromolecule metabolic process	GO:0010604	68	22	15.5963	5.27578	6.62018e-07	1.1806e-05	1
Regulation of intracellular processes and metabolism	6	positive regulation of cellular metabolic process	GO:0031325	69	23	15.8257	5.51559	8.76093e-07	1.44218e-05	1
Regulation of intracellular processes and metabolism	6	positive regulation of nitrogen compound metabolic process	GO:0051173	55	18	12.6147	4.31655	1.34355e-05	0.000125008	1
Regulation of intracellular processes and metabolism	6	positive regulation of cell proliferation	GO:0008284	26	6	5.9633	1.43885	0.000466586	0.00281678	1
Regulation of intracellular processes and metabolism	6	negative regulation of cell proliferation	GO:0008285	33	6	7.56881	1.43885	1.10698e-05	0.000107679	1
Regulation of intracellular processes and metabolism	6	cellular chemical homeostasis	GO:0055082	29	4	6.65138	0.959233	8.80472e-06	9.42105e-05	1
Regulation of intracellular processes and metabolism	6	ion homeostasis	GO:0050801	29	5	6.65138	1.19904	3.15959e-05	0.000270461	1
Regulation of intracellular processes and metabolism	6	negative regulation of ligase activity	GO:0051352	1	21	0.229358	5.03597	3.03638e-06	3.82227e-05	2
Regulation of intracellular processes and metabolism	6	positive regulation of transferase activity	GO:0051347	16	3	3.66972	0.719424	0.00418722	0.0154494	1
Regulation of intracellular processes and metabolism	6	regulation of ubiquitin-protein ligase activity	GO:0051438	1	22	0.229358	5.27578	1.51023e-06	2.0351e-05	2
Regulation of transcription	6	regulation of nucleobase, nucleoside, nucleotide and nucleic acid metabolic process	GO:0019219	139	94	31.8807	22.542	0.00268079	0.0104307	1
Regulation of transcription	6	regulation of gene expression	GO:0010468	143	96	32.7982	23.0216	0.00174123	0.00763888	1
Signal transduction	5	signal transduction	GO:0007165	205	54	47.0183	12.9496	2.63885e-28	4.74993e-26	1
Signal transduction	6	cell surface receptor linked signaling pathway	GO:0007166	128	13	29.3578	3.11751	8.50311e-28	1.81967e-25	1
Signal transduction	6	intracellular signaling pathway	GO:0007242	92	31	21.1009	7.43405	9.46e-09	2.53055e-07	1
Signal transduction	6	regulation of signal transduction	GO:0009966	56	9	12.844	2.15827	1.33578e-09	5.71713e-08	1

## Sheet: recent vs. ancestral
Table S6B: Comparison between recent and ancestral genes
List 1: recent genes
List 2: ancestral genes
Recent genes: genes that originated with metazoans or vertebrates
Ancestral genes: genes that originated with LUCA or eukaryotes
Process	GO level	GO description	GO ID	N genes (list 1)	N genes (list 2)	% of total genes (list 1)	% of total genes (list 2)	p-value	adjusted p-value	Enriched list
Development	5	sex differentiation	GO:0007548	42	51	1.2062	0.634249	0.00294411	0.00816445	1
Development	5	reproductive structure development	GO:0048608	38	39	1.09133	0.485014	0.00042856	0.00133967	1
Multicellular activities	5	ovulation cycle	GO:0042698	20	14	0.574383	0.174108	0.000569584	0.0017666	1
DNA/RNA metabolism and transcription	5	nucleobase, nucleoside and nucleotide metabolic process	GO:0055086	77	271	2.21137	3.37023	0.000709582	0.00214784	2
Cellular metabolism	5	cellular nitrogen compound catabolic process	GO:0044270	5	76	0.143596	0.945156	1.45988e-07	8.3996e-07	2
Cellular metabolism	5	cellular nitrogen compound biosynthetic process	GO:0044271	22	130	0.631821	1.61671	7.25296e-06	3.06322e-05	2
Cellular metabolism	5	macromolecule catabolic process	GO:0043285	165	897	4.73866	11.1553	7.54763e-31	3.74551e-29	2
Cellular metabolism	5	cellular macromolecule catabolic process	GO:0044265	107	547	3.07295	6.80264	6.34651e-17	8.68816e-16	2
Cellular metabolism	5	organic acid catabolic process	GO:0016054	10	90	0.287191	1.11926	1.72199e-06	8.13847e-06	2
Cellular metabolism	5	cofactor catabolic process	GO:0051187	1	27	0.0287191	0.335779	0.000746645	0.00222871	2
Cellular metabolism	5	vitamin biosynthetic process	GO:0009110	2	24	0.0574383	0.29847	0.00955056	0.0231193	2
Cellular metabolism	5	organic acid biosynthetic process	GO:0016053	25	122	0.717978	1.51722	0.000277903	0.000889739	2
Cellular metabolism	5	heterocycle biosynthetic process	GO:0018130	2	42	0.0574383	0.522323	4.37916e-05	0.000168789	2
Cellular metabolism	5	cofactor biosynthetic process	GO:0051188	1	84	0.0287191	1.04465	2.22293e-12	2.00569e-11	2
Cellular metabolism	5	macromolecule modification	GO:0043412	233	1216	6.69156	15.1225	1.53332e-39	1.01454e-37	2
Cellular metabolism	5	cytokine metabolic process	GO:0042107	46	24	1.32108	0.29847	1.20146e-09	8.83296e-09	1
Cellular metabolism	5	cellular amino acid derivative metabolic process	GO:0006575	28	105	0.804136	1.30581	0.0222574	0.0484594	2
Cellular metabolism	5	pteridine and derivative metabolic process	GO:0042558	1	20	0.0287191	0.248725	0.00784734	0.0191129	2
Cellular metabolism	5	water-soluble vitamin metabolic process	GO:0006767	3	51	0.0861574	0.634249	1.69241e-05	6.9988e-05	2
Cellular metabolism	5	phosphate metabolic process	GO:0006796	201	868	5.77254	10.7947	7.87368e-19	1.56292e-17	2
Cellular metabolism	5	hydrogen peroxide metabolic process	GO:0042743	1	19	0.0287191	0.236289	0.0126529	0.028869	2
Cellular metabolism	5	tetrapyrrole metabolic process	GO:0033013	2	23	0.0574383	0.286034	0.0147769	0.0331438	2
Cellular metabolism	5	coenzyme metabolic process	GO:0006732	1	130	0.0287191	1.61671	2.26107e-19	4.72444e-18	2
Cellular metabolism	5	monosaccharide metabolic process	GO:0005996	36	168	1.03389	2.08929	4.18977e-05	0.000163073	2
Cellular metabolism	5	carbohydrate catabolic process	GO:0016052	14	93	0.402068	1.15657	4.67909e-05	0.000175245	2
Cellular metabolism	5	cellular carbohydrate metabolic process	GO:0044262	41	196	1.17748	2.43751	5.75575e-06	2.51102e-05	2
Cellular metabolism	5	cellular lipid metabolic process	GO:0044255	134	480	3.84836	5.96941	1.98128e-06	9.25374e-06	2
Immune system response	5	adaptive immune response based on somatic recombination of immune receptors built from immunoglobulin superfamily domains	GO:0002460	48	29	1.37852	0.360652	5.67516e-09	3.88455e-08	1
Immune system response	5	leukocyte mediated cytotoxicity	GO:0001909	10	5	0.287191	0.0621813	0.0038528	0.0104764	1
Immune system response	5	production of molecular mediator of immune response	GO:0002440	21	17	0.603102	0.211416	0.00128618	0.00381053	1
Immune system response	5	leukocyte mediated immunity	GO:0002443	44	35	1.26364	0.435269	3.00205e-06	1.3699e-05	1
Immune system response	5	antigen processing and presentation of peptide antigen via MHC class I	GO:0002474	7	4	0.201034	0.0497451	0.0224598	0.0484594	1
Immune system response	5	myeloid leukocyte activation	GO:0002274	20	19	0.574383	0.236289	0.00770221	0.0188752	1
Cell motility and interactions	5	heterophilic cell-cell adhesion	GO:0007157	9	6	0.258472	0.0746176	0.0204687	0.0448955	1
Cell motility and interactions	5	homophilic cell adhesion	GO:0007156	72	9	2.06778	0.111926	2.58071e-28	1.13838e-26	1
Cell motility and interactions	5	neuron cell-cell adhesion	GO:0007158	6	1	0.172315	0.0124363	0.00393882	0.0104947	1
Cell motility and interactions	5	calcium-dependent cell-cell adhesion	GO:0016339	10	2	0.287191	0.0248725	0.000219	0.000730614	1
Cell motility and interactions	5	cell-matrix adhesion	GO:0007160	44	44	1.26364	0.547196	9.99582e-05	0.000354316	1
DNA/RNA metabolism and transcription	5	chromatin organization	GO:0006325	36	303	1.03389	3.76819	3.49506e-18	6.03279e-17	2
Multicellular activities	5	pigment granule organization	GO:0048753	7	2	0.201034	0.0248725	0.00447616	0.0116146	1
Cell cycle	5	cell cycle arrest	GO:0007050	38	51	1.09133	0.634249	0.014384	0.0326312	1
Signal transduction	5	generation of a signal involved in cell-cell signaling	GO:0003001	61	30	1.75187	0.373088	6.19488e-13	5.85564e-12	1
Cell cycle	5	apoptosis	GO:0006915	348	437	9.99426	5.43465	5.5176e-18	8.97708e-17	1
Multicellular activities	5	striated muscle cell proliferation	GO:0014855	9	3	0.258472	0.0373088	0.00178163	0.00505221	1
Multicellular activities	5	smooth muscle cell proliferation	GO:0048659	16	11	0.459506	0.136799	0.00238165	0.00670578	1
Development	5	muscle cell differentiation	GO:0042692	32	40	0.919012	0.497451	0.010032	0.0239922	1
Development	5	cell fate commitment	GO:0045165	67	34	1.92418	0.422833	6.82643e-14	7.32457e-13	1
Development	5	fat cell differentiation	GO:0045444	20	22	0.574383	0.273598	0.0179233	0.0397516	1
Development	5	regulation of cell differentiation	GO:0045595	170	150	4.88225	1.86544	5.65307e-18	8.97708e-17	1
Cell cycle	5	cell development	GO:0048468	292	272	8.38599	3.38266	8.41055e-28	3.33899e-26	1
Cell cycle	5	stem cell differentiation	GO:0048863	11	8	0.31591	0.0994901	0.0121813	0.0279536	1
Development	5	pigment cell differentiation	GO:0050931	10	3	0.287191	0.0373088	0.000690465	0.00210857	1
Cellular processes (not DNA/RNA)	5	intracellular transport	GO:0046907	119	482	3.41758	5.99428	3.44131e-09	2.43964e-08	2
Cellular processes (not DNA/RNA)	5	cellular protein localization	GO:0034613	101	311	2.90063	3.86768	0.0101737	0.0241853	2
Multicellular activities	5	muscle contraction	GO:0006936	68	94	1.9529	1.16901	0.0013859	0.0040456	1
Multicellular activities	5	muscle adaptation	GO:0043500	8	4	0.229753	0.0497451	0.00991665	0.0238601	1
Multicellular activities	5	vascular process in circulatory system	GO:0003018	32	24	0.919012	0.29847	2.92565e-05	0.000116148	1
Multicellular activities	5	blood circulation	GO:0008015	79	99	2.26881	1.23119	6.89868e-05	0.00025359	1
Multicellular activities	5	transmission of nerve impulse	GO:0019226	163	132	4.68122	1.64159	1.71455e-19	3.78154e-18	1
Multicellular activities	5	cognition	GO:0050890	224	192	6.43308	2.38776	2.27644e-24	7.53124e-23	1
Multicellular activities	5	neuromuscular process	GO:0050905	26	21	0.746697	0.261162	0.000358008	0.00113703	1
Development	5	embryonic pattern specification	GO:0009880	20	5	0.574383	0.0621813	3.82028e-07	2.10646e-06	1
Development	5	embryonic development ending in birth or egg hatching	GO:0009792	110	106	3.1591	1.31824	1.63943e-10	1.32827e-09	1
Development	5	embryonic morphogenesis	GO:0048598	121	80	3.47501	0.994901	8.71223e-19	1.64703e-17	1
Development	5	regionalization	GO:0003002	101	42	2.90063	0.522323	1.55543e-23	4.41075e-22	1
Development	5	tube morphogenesis	GO:0035239	38	28	1.09133	0.348215	4.79847e-06	2.11666e-05	1
Development	5	skeletal system development	GO:0001501	149	127	4.27915	1.57941	1.16918e-16	1.4973e-15	1
Development	5	urogenital system development	GO:0001655	40	35	1.14877	0.435269	3.7087e-05	0.000145778	1
Development	5	immune system development	GO:0002520	122	140	3.50373	1.74108	2.51115e-08	1.5577e-07	1
Development	5	nervous system development	GO:0007399	388	366	11.143	4.55167	2.71163e-36	1.53788e-34	1
Development	5	endocrine system development	GO:0035270	37	14	1.06261	0.174108	5.33156e-10	4.12496e-09	1
Development	5	organ development	GO:0048513	640	674	18.3802	8.38204	1.51648e-50	2.00681e-48	1
Development	5	appendage morphogenesis	GO:0035107	33	29	0.947731	0.360652	0.000231625	0.000766293	1
Development	5	limb development	GO:0060173	34	30	0.97645	0.373088	0.000167305	0.000572586	1
Multicellular activities	5	hair cycle process	GO:0022405	15	12	0.430787	0.149235	0.00605944	0.0152253	1
Development	5	morphogenesis of a branching structure	GO:0001763	27	21	0.775416	0.261162	0.000203166	0.000689375	1
Development	5	establishment of tissue polarity	GO:0007164	6	1	0.172315	0.0124363	0.00393882	0.0104947	1
Development	5	regulation of anatomical structure morphogenesis	GO:0022603	85	86	2.44113	1.06952	8.34112e-08	4.94242e-07	1
Development	5	cellular component morphogenesis	GO:0032989	151	150	4.33659	1.86544	2.78253e-13	2.76166e-12	1
Development	5	anatomical structure formation involved in morphogenesis	GO:0048646	127	137	3.64733	1.70377	9.72976e-10	7.28814e-09	1
Cell response to stimuli	5	behavioral defense response	GO:0002209	8	2	0.229753	0.0248725	0.00166884	0.00476639	1
Immune system response	5	inflammatory response	GO:0006954	144	97	4.13555	1.20632	1.13238e-21	2.99705e-20	1
Immune system response	5	innate immune response	GO:0045087	56	63	1.60827	0.783485	0.000116709	0.000410032	1
Multicellular activities	5	wound healing	GO:0042060	73	75	2.0965	0.93272	1.25797e-06	6.24267e-06	1
Cell response to stimuli	5	fear response	GO:0042596	11	2	0.31591	0.0248725	7.75606e-05	0.000282491	1
Multicellular activities	5	adult locomotory behavior	GO:0008344	17	15	0.488225	0.186544	0.0066893	0.0164947	1
Cell motility and interactions	5	taxis	GO:0042330	74	30	2.12522	0.373088	6.93808e-18	1.05939e-16	1
Multicellular activities	5	eating behavior	GO:0042755	6	1	0.172315	0.0124363	0.00393882	0.0104947	1
Immune system response	5	immune response to tumor cell	GO:0002418	5	1	0.143596	0.0124363	0.0112915	0.0260624	1
Cell response to stimuli	5	response to virus	GO:0009615	36	43	1.03389	0.534759	0.00436588	0.011403	1
Cell response to stimuli	5	response to organic cyclic substance	GO:0014070	20	9	0.574383	0.111926	1.88298e-05	7.70662e-05	1
Cell response to stimuli	5	response to ATP	GO:0033198	7	1	0.201034	0.0124363	0.00134884	0.00396659	1
Cell response to stimuli	5	response to alkaloid	GO:0043279	17	5	0.488225	0.0621813	7.05496e-06	3.01164e-05	1
Cell response to stimuli	5	response to ethanol	GO:0045471	15	7	0.430787	0.0870538	0.000265019	0.000862397	1
Regulation of intracellular processes and metabolism	5	regulation of protein localization	GO:0032880	47	47	1.3498	0.584504	6.23975e-05	0.000231512	1
Cellular processes (not DNA/RNA)	5	establishment of protein localization	GO:0045184	164	572	4.70994	7.11354	7.49148e-07	3.96549e-06	2
Cellular processes (not DNA/RNA)	5	establishment of RNA localization	GO:0051236	7	76	0.201034	0.945156	2.95136e-06	1.36243e-05	2
Cellular processes (not DNA/RNA)	5	lipid storage	GO:0019915	21	13	0.603102	0.161671	0.000211634	0.000712022	1
Cellular processes (not DNA/RNA)	5	hydrogen transport	GO:0006818	8	53	0.229753	0.659122	0.00296141	0.00816445	2
Cellular processes (not DNA/RNA)	5	lipid transport	GO:0006869	55	81	1.57955	1.00734	0.0110189	0.0257324	1
Cellular processes (not DNA/RNA)	5	hormone transport	GO:0009914	38	21	1.09133	0.261162	7.27565e-08	4.37641e-07	1
Cellular processes (not DNA/RNA)	5	peptide transport	GO:0015833	27	29	0.775416	0.360652	0.00510231	0.0131534	1
Cellular processes (not DNA/RNA)	5	vitamin transport	GO:0051180	10	7	0.287191	0.0870538	0.0155301	0.0346373	1
DNA/RNA metabolism and transcription	5	nucleobase, nucleoside, nucleotide and nucleic acid transport	GO:0015931	8	90	0.229753	1.11926	1.86187e-07	1.05595e-06	2
Regulation of intracellular processes and metabolism	5	regulation of transport	GO:0051049	150	134	4.30787	1.66646	1.09908e-15	1.32222e-14	1
Cellular processes (not DNA/RNA)	5	transmembrane transport	GO:0055085	35	191	1.00517	2.37533	3.42382e-07	1.91444e-06	2
Cell motility and interactions	5	regulation of cellular component movement	GO:0051270	71	60	2.03906	0.746176	1.31563e-08	8.56239e-08	1
Immune system response	5	negative regulation of immune system process	GO:0002683	23	17	0.66054	0.211416	0.000392182	0.00123568	1
Immune system response	5	positive regulation of immune system process	GO:0002684	86	57	2.46984	0.708867	1.16214e-13	1.21413e-12	1
Immune system response	5	regulation of immune response	GO:0050776	69	57	1.98162	0.708867	1.18899e-08	8.00046e-08	1
Regulation of intracellular processes and metabolism	5	regulation of biosynthetic process	GO:0009889	851	1634	24.44	20.3209	1.02752e-06	5.22982e-06	1
Regulation of intracellular processes and metabolism	5	negative regulation of metabolic process	GO:0009892	234	334	6.72028	4.15371	1.24137e-08	8.21376e-08	1
Regulation of intracellular processes and metabolism	5	positive regulation of metabolic process	GO:0009893	294	355	8.44342	4.41487	9.98518e-17	1.32137e-15	1
Regulation of intracellular processes and metabolism	5	regulation of cellular metabolic process	GO:0031323	979	1902	28.116	23.6538	4.68845e-07	2.51529e-06	1
Regulation of intracellular processes and metabolism	5	regulation of multicellular organismal metabolic process	GO:0044246	7	4	0.201034	0.0497451	0.0224598	0.0484594	1
Regulation of intracellular processes and metabolism	5	regulation of nitrogen compound metabolic process	GO:0051171	808	1575	23.2051	19.5871	1.30121e-05	5.43767e-05	1
Regulation of intracellular processes and metabolism	5	regulation of macromolecule metabolic process	GO:0060255	894	1861	25.6749	23.1439	0.0037105	0.0101591	1
Cell response to stimuli	5	positive regulation of cell killing	GO:0031343	9	2	0.258472	0.0248725	0.000609659	0.00187624	1
Development	5	regulation of multicellular organism growth	GO:0040014	26	14	0.746697	0.174108	6.23459e-06	2.69036e-05	1
Cell cycle	5	negative regulation of growth	GO:0045926	38	35	1.09133	0.435269	9.87407e-05	0.000353154	1
Cell cycle	5	positive regulation of growth	GO:0045927	22	21	0.631821	0.261162	0.00423459	0.0111333	1
Regulation of intracellular processes and metabolism	5	positive regulation of cellular process	GO:0048522	605	673	17.3751	8.36961	1.70799e-42	1.65712e-40	1
Cell response to stimuli	5	positive regulation of response to stimulus	GO:0048584	83	69	2.38369	0.858102	3.44375e-10	2.73434e-09	1
Development	5	positive regulation of developmental process	GO:0051094	227	219	6.51924	2.72354	2.03828e-20	5.05748e-19	1
Regulation of intracellular processes and metabolism	5	positive regulation of cellular component organization	GO:0051130	67	56	1.92418	0.696431	2.64173e-08	1.61349e-07	1
Development	5	positive regulation of multicellular organismal process	GO:0051240	82	52	2.35497	0.646686	1.3742e-13	1.39887e-12	1
Regulation of intracellular processes and metabolism	5	negative regulation of cellular process	GO:0048523	512	669	14.7042	8.31986	7.46983e-24	2.28117e-22	1
Development	5	negative regulation of developmental process	GO:0051093	188	221	5.3992	2.74841	9.81137e-12	8.65581e-11	1
Regulation of intracellular processes and metabolism	5	negative regulation of cellular component organization	GO:0051129	44	58	1.26364	0.721303	0.00643918	0.0159772	1
Development	5	negative regulation of multicellular organismal process	GO:0051241	54	47	1.55083	0.584504	1.07427e-06	5.39852e-06	1
Immune system response	5	regulation of response to external stimulus	GO:0032101	54	46	1.55083	0.572068	8.46389e-07	4.36385e-06	1
Multicellular activities	5	regulation of behavior	GO:0050795	21	6	0.603102	0.0746176	4.5529e-07	2.47603e-06	1
Signal transduction	5	signal transduction	GO:0007165	1342	1434	38.5411	17.8336	1.21154e-119	4.80981e-117	1
Cell motility and interactions	5	regulation of cell adhesion	GO:0030155	45	41	1.29236	0.509887	2.58211e-05	0.000103545	1
Cell cycle	5	regulation of cell proliferation	GO:0042127	279	263	8.01264	3.27074	5.36509e-26	1.93631e-24	1
Regulation of intracellular processes and metabolism	5	regulation of cell activation	GO:0050865	71	37	2.03906	0.460142	3.4669e-14	3.82321e-13	1
Regulation of intracellular processes and metabolism	5	regulation of cytokine production	GO:0001817	77	47	2.21137	0.584504	2.97607e-13	2.8817e-12	1
Development	5	regulation of tissue remodeling	GO:0034103	35	22	1.00517	0.273598	1.42272e-06	6.80504e-06	1
Cell cycle	5	cell growth	GO:0016049	78	87	2.24009	1.08195	4.66732e-06	2.08194e-05	1
Regulation of intracellular processes and metabolism	5	negative regulation of cell size	GO:0045792	33	30	0.947731	0.373088	0.000270178	0.000872036	1
Regulation of intracellular processes and metabolism	5	temperature homeostasis	GO:0001659	9	1	0.258472	0.0124363	0.000151943	0.000529134	1
Regulation of intracellular processes and metabolism	5	cellular homeostasis	GO:0019725	160	178	4.59506	2.21366	2.23625e-11	1.92998e-10	1
Regulation of intracellular processes and metabolism	5	regulation of homeostatic process	GO:0032844	44	26	1.26364	0.323343	2.0789e-08	1.31004e-07	1
Multicellular activities	5	multicellular organismal homeostasis	GO:0048871	18	19	0.516944	0.236289	0.0190643	0.0420474	1
Multicellular activities	5	homeostasis of number of cells	GO:0048872	35	46	1.00517	0.572068	0.0145915	0.0329138	1
Regulation of intracellular processes and metabolism	5	chemical homeostasis	GO:0048878	187	181	5.37048	2.25096	5.09663e-17	7.22629e-16	1
Regulation of intracellular processes and metabolism	5	anatomical structure homeostasis	GO:0060249	44	61	1.26364	0.758612	0.0103533	0.0244659	1
Multicellular activities	5	hemostasis	GO:0007599	52	51	1.49339	0.634249	1.93033e-05	7.8198e-05	1
Regulation of intracellular processes and metabolism	5	positive regulation of catalytic activity	GO:0043085	172	217	4.93969	2.69867	3.90534e-09	2.72003e-08	1
Regulation of intracellular processes and metabolism	5	regulation of hydrolase activity	GO:0051336	114	143	3.27398	1.77839	1.30746e-06	6.35738e-06	1
Regulation of intracellular processes and metabolism	5	regulation of transferase activity	GO:0051338	98	158	2.81447	1.96493	0.0057887	0.0146377	1
Regulation of intracellular processes and metabolism	5	regulation of lyase activity	GO:0051339	49	19	1.40724	0.236289	1.24354e-12	1.14811e-11	1
Regulation of intracellular processes and metabolism	5	regulation of ligase activity	GO:0051340	5	70	0.143596	0.870538	8.41202e-07	4.36385e-06	2
Development	6	development of primary sexual characteristics	GO:0045137	36	43	1.03389	0.534759	0.00436588	0.0140276	1
Development	6	female sex differentiation	GO:0046660	21	18	0.603102	0.223853	0.00244977	0.00841916	1
Multicellular activities	6	ovulation cycle process	GO:0022602	19	14	0.545663	0.174108	0.00176953	0.00632379	1
Cellular metabolism	6	nucleoside phosphate metabolic process	GO:0006753	77	253	2.21137	3.14637	0.005133	0.0158365	2
Cellular metabolism	6	amine catabolic process	GO:0009310	4	62	0.114877	0.771048	2.39621e-06	1.54898e-05	2
Cellular metabolism	6	amine biosynthetic process	GO:0009309	5	68	0.143596	0.845666	2.09686e-06	1.3718e-05	2
Cellular metabolism	6	protein catabolic process	GO:0030163	142	793	4.07812	9.86196	2.39332e-28	3.24893e-26	2
Cellular metabolism	6	modification-dependent macromolecule catabolic process	GO:0043632	78	446	2.24009	5.54657	1.28388e-16	3.66918e-15	2
Cellular metabolism	6	cytokine biosynthetic process	GO:0042089	45	24	1.29236	0.29847	2.3853e-09	2.75578e-08	1
Cellular metabolism	6	lipoprotein biosynthetic process	GO:0042158	8	47	0.229753	0.584504	0.0115345	0.0322734	2
Cellular metabolism	6	proteoglycan metabolic process	GO:0006029	21	15	0.603102	0.186544	0.000734414	0.00306759	1
Cellular metabolism	6	cellular protein metabolic process	GO:0044267	391	1921	11.2292	23.8901	2.5873e-59	7.02453e-57	2
DNA/RNA metabolism and transcription	6	DNA metabolic process	GO:0006259	95	386	2.72832	4.8004	1.5234e-07	1.3342e-06	2
Cellular metabolism	6	macromolecule glycosylation	GO:0043413	20	97	0.574383	1.20632	0.00158379	0.00597221	2
Cellular metabolism	6	carboxylic acid metabolic process	GO:0019752	65	435	1.86674	5.40977	3.73876e-20	2.90021e-18	2
Cellular metabolism	6	cellular amino acid derivative biosynthetic process	GO:0042398	6	39	0.172315	0.485014	0.0137051	0.0372093	2
Cellular metabolism	6	phosphorylation	GO:0016310	191	732	5.48535	9.10335	1.44614e-11	2.01347e-10	2
Cellular metabolism	6	dephosphorylation	GO:0016311	12	129	0.34463	1.60428	4.71593e-10	5.69056e-09	2
Cellular metabolism	6	porphyrin metabolic process	GO:0006778	2	23	0.0574383	0.286034	0.0147769	0.0397222	2
Cellular metabolism	6	group transfer coenzyme metabolic process	GO:0006752	1	24	0.0287191	0.29847	0.00194412	0.00689971	2
Cellular metabolism	6	membrane lipid metabolic process	GO:0006643	10	61	0.287191	0.758612	0.00256916	0.00872748	2
Immune system response	6	T-helper 1 type immune response	GO:0042088	7	2	0.201034	0.0248725	0.00447616	0.0141311	1
Cellular metabolism	6	immunoglobulin production	GO:0002377	17	12	0.488225	0.149235	0.00177019	0.00632379	1
Immune system response	6	lymphocyte mediated immunity	GO:0002449	40	29	1.14877	0.360652	2.04801e-06	1.35618e-05	1
Immune system response	6	lymphocyte activation during immune response	GO:0002285	10	6	0.287191	0.0746176	0.0106528	0.0309329	1
Immune system response	6	natural killer cell activation	GO:0030101	12	2	0.34463	0.0248725	2.7138e-05	0.000148848	1
Immune system response	6	T cell activation	GO:0042110	75	51	2.15393	0.634249	1.19918e-11	1.71356e-10	1
Immune system response	6	B cell activation	GO:0042113	52	22	1.49339	0.273598	1.27399e-12	2.23154e-11	1
Immune system response	6	lymphocyte proliferation	GO:0046651	43	21	1.23492	0.261162	1.17181e-09	1.38325e-08	1
Development	6	regulation of smooth muscle cell proliferation	GO:0048660	16	9	0.459506	0.111926	0.000612239	0.00263846	1
Multicellular activities	6	regulation of muscle cell differentiation	GO:0051147	12	4	0.34463	0.0497451	0.000283982	0.00131797	1
Development	6	muscle cell development	GO:0055001	12	10	0.34463	0.124363	0.0186383	0.0481932	1
Development	6	cell fate specification	GO:0001708	27	11	0.775416	0.136799	2.43606e-07	1.94527e-06	1
Development	6	cell fate determination	GO:0001709	16	12	0.459506	0.149235	0.00327907	0.0108569	1
Development	6	negative regulation of cell differentiation	GO:0045596	68	68	1.9529	0.845666	1.22773e-06	8.77178e-06	1
Development	6	positive regulation of cell differentiation	GO:0045597	91	66	2.61344	0.820793	4.94152e-13	9.25256e-12	1
Cell cycle	6	developmental programmed cell death	GO:0010623	6	2	0.172315	0.0248725	0.0117087	0.0322734	1
Development	6	neurogenesis	GO:0022008	195	178	5.60023	2.21366	2.13572e-19	1.44962e-17	1
Development	6	cell maturation	GO:0048469	27	24	0.775416	0.29847	0.000684944	0.00290051	1
Development	6	melanocyte differentiation	GO:0030318	10	2	0.287191	0.0248725	0.000219	0.00103406	1
Cellular processes (not DNA/RNA)	6	cytoskeleton-dependent intracellular transport	GO:0030705	5	37	0.143596	0.460142	0.0104297	0.0305301	2
Cellular processes (not DNA/RNA)	6	Golgi vesicle transport	GO:0048193	6	82	0.172315	1.01977	1.26139e-07	1.14155e-06	2
DNA/RNA metabolism and transcription	6	ribonucleoprotein complex assembly	GO:0022618	4	41	0.114877	0.509887	0.000948096	0.00381345	2
DNA/RNA metabolism and transcription	6	protein-DNA complex assembly	GO:0065004	4	75	0.114877	0.93272	4.22026e-08	4.02035e-07	2
Multicellular activities	6	plasma lipoprotein particle remodeling	GO:0034369	11	6	0.31591	0.0746176	0.00561959	0.0170471	1
Multicellular activities	6	regulation of muscle contraction	GO:0006937	23	26	0.66054	0.323343	0.0181381	0.0473508	1
Multicellular activities	6	smooth muscle contraction	GO:0006939	27	15	0.775416	0.186544	5.40178e-06	3.25907e-05	1
Multicellular activities	6	striated muscle adaptation	GO:0014888	5	1	0.143596	0.0124363	0.0112915	0.0317683	1
Multicellular activities	6	muscle hypertrophy	GO:0014896	7	1	0.201034	0.0124363	0.00134884	0.00515789	1
Multicellular activities	6	regulation of blood pressure	GO:0008217	32	37	0.919012	0.460142	0.00531528	0.0163062	1
Multicellular activities	6	synaptic transmission	GO:0007268	142	115	4.07812	1.43017	4.73166e-17	1.51135e-15	1
Cell response to stimuli	6	sensory perception	GO:0007600	199	160	5.71511	1.9898	7.58219e-24	6.86189e-22	1
Multicellular activities	6	startle response	GO:0001964	9	1	0.258472	0.0124363	0.000151943	0.000736651	1
Development	6	embryonic axis specification	GO:0000578	7	2	0.201034	0.0248725	0.00447616	0.0141311	1
Development	6	chordate embryonic development	GO:0043009	109	105	3.13038	1.30581	2.1856e-10	2.75995e-09	1
Development	6	embryonic appendage morphogenesis	GO:0035113	31	22	0.890293	0.273598	2.85827e-05	0.000155204	1
Development	6	anterior/posterior pattern formation	GO:0009952	67	25	1.92418	0.310907	3.55651e-17	1.28746e-15	1
Development	6	dorsal/ventral pattern formation	GO:0009953	28	18	0.804136	0.223853	1.71186e-05	9.88875e-05	1
Development	6	segmentation	GO:0035282	22	11	0.631821	0.136799	2.33802e-05	0.000130881	1
Development	6	branching morphogenesis of a tube	GO:0048754	23	18	0.66054	0.223853	0.000891605	0.00366774	1
Development	6	kidney development	GO:0001822	32	32	0.919012	0.39796	0.000928372	0.00379027	1
Development	6	synapse assembly	GO:0007416	13	7	0.373349	0.0870538	0.00210977	0.00734361	1
Development	6	central nervous system development	GO:0007417	142	150	4.07812	1.86544	2.58447e-11	3.50841e-10	1
Development	6	nerve development	GO:0021675	13	7	0.373349	0.0870538	0.00210977	0.00734361	1
Development	6	regulation of nervous system development	GO:0051960	64	51	1.83802	0.634249	1.53009e-08	1.59777e-07	1
Development	6	vasculature development	GO:0001944	96	111	2.75704	1.38043	8.2113e-07	6.02532e-06	1
Development	6	organ morphogenesis	GO:0009887	295	256	8.47214	3.18368	1.83009e-31	3.31246e-29	1
Development	6	tissue development	GO:0009888	260	245	7.46697	3.04688	2.11615e-24	2.29814e-22	1
Development	6	sensory organ development	GO:0007423	89	66	2.556	0.820793	1.65175e-12	2.80282e-11	1
Development	6	heart development	GO:0007507	68	85	1.9529	1.05708	0.000183018	0.000879457	1
Development	6	muscle organ development	GO:0007517	79	112	2.26881	1.39286	0.00106772	0.0042319	1
Development	6	pancreas development	GO:0031016	18	6	0.516944	0.0746176	7.73032e-06	4.56257e-05	1
Development	6	gland development	GO:0048732	58	31	1.66571	0.385524	9.69794e-12	1.42324e-10	1
Development	6	limb morphogenesis	GO:0035108	33	29	0.947731	0.360652	0.000231625	0.00108425	1
Development	6	cell morphogenesis	GO:0000902	139	134	3.99196	1.66646	6.21011e-13	1.12403e-11	1
Development	6	cell part morphogenesis	GO:0032990	88	76	2.52728	0.945156	3.21155e-10	3.96334e-09	1
Cell response to stimuli	6	behavioral fear response	GO:0001662	8	2	0.229753	0.0248725	0.00166884	0.00616447	1
Cell response to stimuli	6	acute inflammatory response	GO:0002526	36	28	1.03389	0.348215	1.52307e-05	8.89277e-05	1
Multicellular activities	6	blood coagulation	GO:0007596	49	50	1.40724	0.621813	6.07392e-05	0.000314108	1
Multicellular activities	6	circadian sleep/wake cycle	GO:0042745	5	1	0.143596	0.0124363	0.0112915	0.0317683	1
Cell motility and interactions	6	chemotaxis	GO:0006935	74	30	2.12522	0.373088	6.93808e-18	2.89798e-16	1
Cell response to stimuli	6	response to food	GO:0032094	6	1	0.172315	0.0124363	0.00393882	0.0128071	1
Cell response to stimuli	6	detection of light stimulus	GO:0009583	17	14	0.488225	0.174108	0.00509302	0.0158029	1
Cell response to stimuli	6	response to steroid hormone stimulus	GO:0048545	27	30	0.775416	0.373088	0.00849002	0.0251917	1
Cell response to stimuli	6	response to nicotine	GO:0035094	9	1	0.258472	0.0124363	0.000151943	0.000736651	1
Cell response to stimuli	6	response to calcium ion	GO:0051592	19	16	0.545663	0.19898	0.00294581	0.00993526	1
Cellular processes (not DNA/RNA)	6	apical protein localization	GO:0045176	6	2	0.172315	0.0248725	0.0117087	0.0322734	1
Cellular processes (not DNA/RNA)	6	protein transport	GO:0015031	161	567	4.62378	7.05136	5.24655e-07	3.95677e-06	2
Cellular processes (not DNA/RNA)	6	endocytosis	GO:0006897	88	117	2.52728	1.45504	0.000113299	0.000559287	1
Cellular processes (not DNA/RNA)	6	peptide secretion	GO:0002790	25	20	0.717978	0.248725	0.000469468	0.00208952	1
Cellular processes (not DNA/RNA)	6	secretion by cell	GO:0032940	120	109	3.4463	1.35555	1.86843e-12	3.07441e-11	1
Cellular processes (not DNA/RNA)	6	acid secretion	GO:0046717	7	3	0.201034	0.0373088	0.0110266	0.0317683	1
Regulation of intracellular processes and metabolism	6	regulation of secretion	GO:0051046	68	45	1.9529	0.559632	3.92319e-11	5.07213e-10	1
Cellular processes (not DNA/RNA)	6	ion transmembrane transport	GO:0034220	5	38	0.143596	0.472578	0.00700058	0.0211184	2
Regulation of intracellular processes and metabolism	6	regulation of ion transport	GO:0043269	35	16	1.00517	0.19898	2.69104e-08	2.65679e-07	1
Regulation of intracellular processes and metabolism	6	regulation of neurotransmitter transport	GO:0051588	10	5	0.287191	0.0621813	0.0038528	0.0126028	1
Cellular processes (not DNA/RNA)	6	monoamine transport	GO:0015844	17	11	0.488225	0.136799	0.00133804	0.00515287	1
Regulation of intracellular processes and metabolism	6	regulation of amine transport	GO:0051952	17	1	0.488225	0.0124363	1.8304e-08	1.84057e-07	1
Regulation of intracellular processes and metabolism	6	regulation of organic acid transport	GO:0032890	8	2	0.229753	0.0248725	0.00166884	0.00616447	1
DNA/RNA metabolism and transcription	6	nucleic acid transport	GO:0050657	7	76	0.201034	0.945156	2.95136e-06	1.84465e-05	2
Regulation of intracellular processes and metabolism	6	positive regulation of transport	GO:0051050	84	54	2.41241	0.671558	8.20544e-14	1.71368e-12	1
Regulation of intracellular processes and metabolism	6	negative regulation of transport	GO:0051051	50	42	1.43596	0.522323	1.70528e-06	1.15746e-05	1
Cell motility and interactions	6	cell migration	GO:0016477	147	122	4.22171	1.51722	4.39757e-17	1.49243e-15	1
Cell motility and interactions	6	negative regulation of cellular component movement	GO:0051271	26	25	0.746697	0.310907	0.00198599	0.00700255	1
Cell motility and interactions	6	positive regulation of cellular component movement	GO:0051272	36	22	1.03389	0.273598	7.7527e-07	5.76674e-06	1
Immune system response	6	positive regulation of immune response	GO:0050778	46	39	1.32108	0.485014	4.39081e-06	2.70933e-05	1
Immune system response	6	regulation of immune effector process	GO:0002697	28	24	0.804136	0.29847	0.000399061	0.00182092	1
Immune system response	6	regulation of adaptive immune response	GO:0002819	19	12	0.545663	0.149235	0.000532035	0.00231116	1
Regulation of intracellular processes and metabolism	6	negative regulation of biosynthetic process	GO:0009890	181	248	5.19816	3.08419	9.59094e-08	8.97911e-07	1
Regulation of intracellular processes and metabolism	6	positive regulation of biosynthetic process	GO:0009891	248	268	7.12234	3.33292	3.58967e-18	1.77199e-16	1
Regulation of intracellular processes and metabolism	6	regulation of cellular biosynthetic process	GO:0031326	847	1630	24.3251	20.2711	1.45256e-06	9.98405e-06	1
Regulation of intracellular processes and metabolism	6	negative regulation of macromolecule metabolic process	GO:0010605	219	321	6.28949	3.99204	1.93104e-07	1.61316e-06	1
Regulation of intracellular processes and metabolism	6	negative regulation of cellular metabolic process	GO:0031324	213	314	6.11717	3.90499	3.95852e-07	3.07068e-06	1
Regulation of intracellular processes and metabolism	6	negative regulation of nitrogen compound metabolic process	GO:0051172	160	231	4.59506	2.87278	5.17353e-06	3.15643e-05	1
Regulation of intracellular processes and metabolism	6	positive regulation of catabolic process	GO:0009896	20	22	0.574383	0.273598	0.0179233	0.0470161	1
Regulation of intracellular processes and metabolism	6	positive regulation of macromolecule metabolic process	GO:0010604	279	335	8.01264	4.16615	3.40985e-16	8.41612e-15	1
Regulation of intracellular processes and metabolism	6	positive regulation of cellular metabolic process	GO:0031325	285	341	8.18495	4.24077	1.3526e-16	3.67231e-15	1
Regulation of intracellular processes and metabolism	6	positive regulation of nitrogen compound metabolic process	GO:0051173	227	245	6.51924	3.04688	1.07769e-16	3.25103e-15	1
Regulation of transcription	6	regulation of nucleobase, nucleoside, nucleotide and nucleic acid metabolic process	GO:0019219	799	1564	22.9466	19.4503	2.41342e-05	0.000133723	1
Regulation of intracellular processes and metabolism	6	regulation of phosphorus metabolic process	GO:0051174	141	204	4.0494	2.537	2.19019e-05	0.000123883	1
Regulation of transcription	6	regulation of gene expression	GO:0010468	791	1628	22.7168	20.2462	0.0030321	0.0101632	1
Regulation of intracellular processes and metabolism	6	regulation of lipid metabolic process	GO:0019216	37	37	1.06261	0.460142	0.000497191	0.00219492	1
Development	6	positive regulation of multicellular organism growth	GO:0040018	11	5	0.31591	0.0621813	0.00166125	0.00616447	1
Regulation of intracellular processes and metabolism	6	positive regulation of cell proliferation	GO:0008284	149	124	4.27915	1.5421	2.60817e-17	1.0116e-15	1
Cell motility and interactions	6	positive regulation of cell adhesion	GO:0045785	22	12	0.631821	0.149235	3.82691e-05	0.000205744	1
Cell cycle	6	positive regulation of cell cycle	GO:0045787	28	14	0.804136	0.174108	1.41709e-06	9.8651e-06	1
Regulation of intracellular processes and metabolism	6	positive regulation of cell activation	GO:0050867	51	23	1.46468	0.286034	9.29708e-12	1.40231e-10	1
Cell response to stimuli	6	positive regulation of response to biotic stimulus	GO:0002833	5	1	0.143596	0.0124363	0.0112915	0.0317683	1
Cell response to stimuli	6	positive regulation of response to external stimulus	GO:0032103	30	11	0.861574	0.136799	1.70821e-08	1.75011e-07	1
Multicellular activities	6	positive regulation of behavior	GO:0048520	18	5	0.516944	0.0621813	2.69784e-06	1.72344e-05	1
Regulation of intracellular processes and metabolism	6	positive regulation of cytokine production	GO:0001819	28	20	0.804136	0.248725	5.48156e-05	0.000286201	1
Regulation of intracellular processes and metabolism	6	positive regulation of tissue remodeling	GO:0034105	14	8	0.402068	0.0994901	0.0015695	0.00595971	1
Regulation of intracellular processes and metabolism	6	negative regulation of cell proliferation	GO:0008285	136	122	3.9058	1.51722	3.95195e-14	8.58364e-13	1
Cell cycle	6	negative regulation of cell cycle	GO:0045786	25	28	0.717978	0.348215	0.0101595	0.0299817	1
Regulation of intracellular processes and metabolism	6	negative regulation of cell activation	GO:0050866	17	12	0.488225	0.149235	0.00177019	0.00632379	1
Immune system response	6	negative regulation of cytokine production	GO:0001818	12	9	0.34463	0.111926	0.0144976	0.0391651	1
Regulation of intracellular processes and metabolism	6	negative regulation of tissue remodeling	GO:0034104	11	2	0.31591	0.0248725	7.75606e-05	0.000393602	1
Immune system response	6	regulation of response to tumor cell	GO:0002834	5	1	0.143596	0.0124363	0.0112915	0.0317683	1
Cell response to stimuli	6	regulation of defense response	GO:0031347	40	40	1.14877	0.497451	0.000209393	0.000997373	1
Cell cycle	6	regulation of programmed cell death	GO:0043067	257	309	7.38082	3.84281	7.80317e-15	1.84223e-13	1
Cell cycle	6	regulation of mitotic cell cycle	GO:0007346	52	74	1.49339	0.920284	0.00826545	0.0246601	1
Signal transduction	6	cell surface receptor linked signaling pathway	GO:0007166	806	438	23.1476	5.44708	4.72072e-158	2.56335e-155	1
Signal transduction	6	intracellular signaling pathway	GO:0007242	489	819	14.0437	10.1853	3.76283e-09	4.08643e-08	1
Signal transduction	6	regulation of signal transduction	GO:0009966	290	352	8.32855	4.37756	2.23046e-16	5.76732e-15	1
Regulation of intracellular processes and metabolism	6	regulation of endothelial cell proliferation	GO:0001936	16	8	0.459506	0.0994901	0.000420757	0.00190392	1
Regulation of intracellular processes and metabolism	6	regulation of epithelial cell proliferation	GO:0050678	27	14	0.775416	0.174108	2.95551e-06	1.84465e-05	1
Immune system response	6	regulation of leukocyte activation	GO:0002694	67	35	1.92418	0.435269	2.26143e-13	4.38556e-12	1
Regulation of intracellular processes and metabolism	6	regulation of chemokine production	GO:0032642	10	4	0.287191	0.0497451	0.00176052	0.00632379	1
Immune system response	6	regulation of interferon-gamma production	GO:0032649	11	8	0.31591	0.0994901	0.0121813	0.0332384	1
Immune system response	6	regulation of interleukin-2 production	GO:0032663	13	6	0.373349	0.0746176	0.000660302	0.00282318	1
Immune system response	6	regulation of interleukin-6 production	GO:0032675	17	12	0.488225	0.149235	0.00177019	0.00632379	1
Development	6	regulation of bone remodeling	GO:0046850	34	21	0.97645	0.261162	1.92307e-06	1.28917e-05	1
Development	6	regulation of neurological system process	GO:0031644	36	35	1.03389	0.435269	0.000372673	0.00171493	1
Regulation of intracellular processes and metabolism	6	regulation of cell growth	GO:0001558	64	62	1.83802	0.771048	1.2542e-06	8.84452e-06	1
Regulation of intracellular processes and metabolism	6	cell redox homeostasis	GO:0045454	5	47	0.143596	0.584504	0.00068907	0.00290051	2
Regulation of intracellular processes and metabolism	6	cellular chemical homeostasis	GO:0055082	151	121	4.33659	1.50479	2.84011e-18	1.54218e-16	1
Regulation of intracellular processes and metabolism	6	negative regulation of homeostatic process	GO:0032845	9	4	0.258472	0.0497451	0.00423677	0.0136938	1
Regulation of intracellular processes and metabolism	6	positive regulation of homeostatic process	GO:0032846	15	5	0.430787	0.0621813	4.64663e-05	0.000244963	1
Regulation of intracellular processes and metabolism	6	tissue homeostasis	GO:0001894	18	18	0.516944	0.223853	0.0164918	0.0436832	1
Multicellular activities	6	leukocyte homeostasis	GO:0001776	17	8	0.488225	0.0994901	0.000107144	0.000533755	1
Regulation of intracellular processes and metabolism	6	carbohydrate homeostasis	GO:0033500	20	15	0.574383	0.186544	0.00125526	0.00490366	1
Regulation of intracellular processes and metabolism	6	ion homeostasis	GO:0050801	152	144	4.36531	1.79082	2.13181e-14	4.82321e-13	1
Regulation of intracellular processes and metabolism	6	lipid homeostasis	GO:0055088	21	17	0.603102	0.211416	0.00128618	0.00498852	1
Regulation of intracellular processes and metabolism	6	negative regulation of hydrolase activity	GO:0051346	16	15	0.459506	0.186544	0.0168158	0.0443252	1
Regulation of intracellular processes and metabolism	6	negative regulation of lyase activity	GO:0051350	23	7	0.66054	0.0870538	2.00185e-07	1.64697e-06	1
Regulation of intracellular processes and metabolism	6	negative regulation of ligase activity	GO:0051352	3	59	0.0861574	0.73374	1.05818e-06	7.6612e-06	2
Regulation of intracellular processes and metabolism	6	positive regulation of hydrolase activity	GO:0051345	83	53	2.38369	0.659122	1.03789e-13	2.08732e-12	1
Regulation of intracellular processes and metabolism	6	positive regulation of transferase activity	GO:0051347	71	85	2.03906	1.05708	6.6828e-05	0.000342336	1
Regulation of intracellular processes and metabolism	6	positive regulation of lyase activity	GO:0051349	28	11	0.804136	0.136799	1.01398e-07	9.33203e-07	1
Regulation of intracellular processes and metabolism	6	positive regulation of ligase activity	GO:0051351	3	65	0.0861574	0.808357	1.69525e-07	1.43831e-06	2
Regulation of intracellular processes and metabolism	6	positive regulation of oxidoreductase activity	GO:0051353	13	10	0.373349	0.124363	0.0104578	0.0305301	1
Regulation of intracellular processes and metabolism	6	regulation of GTPase activity	GO:0043087	19	80	0.545663	0.994901	0.0154557	0.041342	2
Regulation of intracellular processes and metabolism	6	regulation of peptidase activity	GO:0052547	32	30	0.919012	0.373088	0.000440865	0.00197843	1
Regulation of intracellular processes and metabolism	6	regulation of lipase activity	GO:0060191	55	11	1.57955	0.136799	4.53081e-19	2.73359e-17	1
Regulation of intracellular processes and metabolism	6	regulation of ubiquitin-protein ligase activity	GO:0051438	4	69	0.114877	0.858102	2.5529e-07	2.00902e-06	2
Regulation of intracellular processes and metabolism	6	regulation of monooxygenase activity	GO:0032768	12	10	0.34463	0.124363	0.0186383	0.0481932	1
Regulation of intracellular processes and metabolism	6	regulation of protein homodimerization activity	GO:0043496	5	1	0.143596	0.0124363	0.0112915	0.0317683	1

## Sheet: duplicated vs. singletons
Table S6C: Comparison between duplicated and singleton genes
List 1: duplicated genes
List 2: singleton genes
Process	GO level	GO description	GO ID	N genes (list 1)	N genes (list 2)	% of total genes (list 1)	% of total genes (list 2)	p-value	adjusted p-value	Enriched list
Cell cycle	5	sister chromatid segregation	GO:0000819	12	16	0.134801	0.425645	0.00289632	0.0191731	2
Cell cycle	5	cell cycle phase	GO:0022403	251	162	2.81959	4.30966	2.95657e-05	0.000340875	2
Cell cycle	5	apoptosis	GO:0006915	553	305	6.21209	8.11386	0.000125943	0.00123424	2
Cell cycle	5	cell development	GO:0048468	473	122	5.31341	3.24554	2.41285e-07	3.94098e-06	1
Cell cycle	5	regulation of cell cycle	GO:0051726	153	107	1.71871	2.8465	8.48622e-05	0.000883159	2
Cell cycle	6	M phase	GO:0000279	192	141	2.15682	3.751	7.2871e-07	2.23471e-05	2
Cell cycle	6	cell cycle checkpoint	GO:0000075	37	38	0.415637	1.01091	0.00018206	0.00245115	2
Cell cycle	6	regulation of mitotic cell cycle	GO:0007346	71	62	0.797574	1.64937	3.51647e-05	0.000718922	2
Cell cycle	6	regulation of cell cycle process	GO:0010564	47	39	0.527971	1.03751	0.00199774	0.0172305	2
Cell motility and interactions	5	homophilic cell adhesion	GO:0007156	94	4	1.05594	0.106411	2.00264e-10	5.60739e-09	1
Cell motility and interactions	5	calcium-dependent cell-cell adhesion	GO:0016339	21	1	0.235902	0.0266028	0.00829579	0.0433593	1
Cell motility and interactions	5	calcium-independent cell-cell adhesion	GO:0016338	1	21	0.0112334	0.558659	1.27634e-10	3.84865e-09	2
Cell motility and interactions	5	cell-matrix adhesion	GO:0007160	81	16	0.909908	0.425645	0.0035473	0.0220721	1
Cell motility and interactions	5	cell-substrate junction assembly	GO:0007044	21	1	0.235902	0.0266028	0.00829579	0.0433593	1
Cell response to stimuli	5	response to virus	GO:0009615	49	51	0.550438	1.35674	7.94964e-06	0.000100525	2
Cell response to stimuli	5	response to bacterium	GO:0009617	58	52	0.651539	1.38335	9.32457e-05	0.000937239	2
Cell response to stimuli	5	response to fungus	GO:0009620	5	11	0.0561672	0.292631	0.00141458	0.0100821	2
Cell response to stimuli	6	sensory perception	GO:0007600	362	296	4.0665	7.87443	1.97415e-17	1.81621e-15	2
Cell response to stimuli	6	defense response to bacterium	GO:0042742	34	44	0.381937	1.17052	1.1255e-06	3.26988e-05	2
Cell response to stimuli	6	defense response to fungus	GO:0050832	2	8	0.0224669	0.212823	0.0014682	0.0142184	2
Cell response to stimuli	6	response to gamma radiation	GO:0010332	3	9	0.0337003	0.239425	0.0015503	0.0145045	2
Cellular metabolism	5	cellular nitrogen compound biosynthetic process	GO:0044271	77	79	0.864974	2.10162	4.32822e-08	8.92981e-07	2
Cellular metabolism	5	macromolecule catabolic process	GO:0043285	818	291	9.18895	7.74142	0.0088988	0.045899	1
Cellular metabolism	5	aromatic compound catabolic process	GO:0019439	6	14	0.0674006	0.372439	0.000228462	0.00208273	2
Cellular metabolism	5	macromolecule biosynthetic process	GO:0043284	2180	758	24.4889	20.1649	1.14574e-07	2.0415e-06	1
Cellular metabolism	5	heterocycle biosynthetic process	GO:0018130	16	28	0.179735	0.744879	3.33454e-06	4.50738e-05	2
Cellular metabolism	5	aromatic compound biosynthetic process	GO:0019438	6	11	0.0674006	0.292631	0.00293466	0.0191731	2
Cellular metabolism	5	cofactor biosynthetic process	GO:0051188	33	52	0.370703	1.38335	2.32911e-09	5.70632e-08	2
Cellular metabolism	5	macromolecule modification	GO:0043412	1151	348	12.9297	9.25778	2.83767e-09	6.54333e-08	1
Cellular metabolism	5	collagen metabolic process	GO:0032963	32	3	0.35947	0.0798085	0.00470121	0.0271011	1
Cellular metabolism	5	cytokine metabolic process	GO:0042107	43	35	0.483038	0.931099	0.00578871	0.0319602	2
Cellular metabolism	5	lipoprotein metabolic process	GO:0042157	23	54	0.258369	1.43655	2.46841e-13	9.67616e-12	2
Cellular metabolism	5	energy derivation by oxidation of organic compounds	GO:0015980	77	68	0.864974	1.80899	1.37069e-05	0.000167909	2
Cellular metabolism	5	phosphate metabolic process	GO:0006796	886	234	9.95282	6.22506	3.91473e-12	1.39507e-10	1
Cellular metabolism	5	tetrapyrrole metabolic process	GO:0033013	10	15	0.112334	0.399042	0.00171492	0.0117939	2
Cellular metabolism	5	coenzyme metabolic process	GO:0006732	64	68	0.71894	1.80899	1.4218e-07	2.42324e-06	2
Cellular metabolism	6	tetrapyrrole biosynthetic process	GO:0033014	5	14	0.0561672	0.372439	9.43951e-05	0.00140827	2
Cellular metabolism	6	pteridine and derivative biosynthetic process	GO:0042559	4	9	0.0449337	0.239425	0.00370976	0.0280518	2
Cellular metabolism	6	protein catabolic process	GO:0030163	756	218	8.49247	5.79941	1.13924e-07	4.19241e-06	1
Cellular metabolism	6	lipoprotein biosynthetic process	GO:0042158	14	42	0.157268	1.11732	3.03844e-12	1.86357e-10	2
Cellular metabolism	6	coenzyme biosynthetic process	GO:0009108	26	34	0.292069	0.904496	1.36679e-05	0.000301788	2
Cellular metabolism	6	aminoglycan metabolic process	GO:0006022	36	31	0.404404	0.824687	0.00449227	0.0322043	2
Cellular metabolism	6	cellular protein metabolic process	GO:0044267	1732	654	19.4563	17.3982	0.00671333	0.0441162	1
Cellular metabolism	6	carboxylic acid metabolic process	GO:0019752	334	180	3.75197	4.78851	0.00775289	0.0486318	2
Cellular metabolism	6	phosphorylation	GO:0016310	744	216	8.35767	5.74621	2.52956e-07	8.21364e-06	1
Cellular metabolism	6	dephosphorylation	GO:0016311	140	17	1.57268	0.452248	1.81675e-08	8.35703e-07	1
Cellular metabolism	6	porphyrin metabolic process	GO:0006778	10	15	0.112334	0.399042	0.00171492	0.0156451	2
Cellular metabolism	6	oxidoreduction coenzyme metabolic process	GO:0006733	21	22	0.235902	0.585262	0.00381666	0.0284702	2
Cellular metabolism	6	glycerolipid metabolic process	GO:0046486	77	59	0.864974	1.56957	0.000647879	0.00729855	2
Cellular metabolism	6	immunoglobulin production	GO:0002377	14	20	0.157268	0.532056	0.000478127	0.00569125	2
Cellular processes (not DNA/RNA)	5	electron transport chain	GO:0022900	43	62	0.483038	1.64937	4.62197e-10	1.20787e-08	2
Cellular processes (not DNA/RNA)	5	cellular protein localization	GO:0034613	271	154	3.04426	4.09683	0.00348874	0.0220579	2
Cellular processes (not DNA/RNA)	5	vesicle-mediated transport	GO:0016192	402	122	4.51584	3.24554	0.000888736	0.00710989	1
Cellular processes (not DNA/RNA)	5	ion transport	GO:0006811	624	114	7.00966	3.03272	2.92845e-20	1.91325e-18	1
Cellular processes (not DNA/RNA)	5	neurotransmitter transport	GO:0006836	67	10	0.75264	0.266028	0.00098298	0.00755545	1
Cellular processes (not DNA/RNA)	5	hormone transport	GO:0009914	33	30	0.370703	0.798085	0.00328368	0.0211017	2
Cellular processes (not DNA/RNA)	5	organic acid transport	GO:0015849	108	19	1.21321	0.505454	0.000178619	0.00166711	1
Cellular processes (not DNA/RNA)	6	peroxisomal transport	GO:0043574	2	12	0.0224669	0.319234	2.22751e-05	0.000472917	2
Cellular processes (not DNA/RNA)	6	endocytosis	GO:0006897	185	40	2.07818	1.06411	4.65417e-05	0.00083269	1
Cellular processes (not DNA/RNA)	6	cation transport	GO:0006812	447	93	5.02134	2.47406	1.17726e-11	6.4985e-10	1
Cellular processes (not DNA/RNA)	6	anion transport	GO:0006820	110	15	1.23568	0.399042	4.28893e-06	0.000107613	1
Cellular processes (not DNA/RNA)	6	carboxylic acid transport	GO:0046942	107	19	1.20198	0.505454	0.000174011	0.00240135	1
Development	5	cell fate commitment	GO:0045165	95	8	1.06718	0.212823	9.34061e-08	1.74358e-06	1
Development	5	regulation of cell differentiation	GO:0045595	262	74	2.94316	1.96861	0.00161694	0.0113186	1
Development	5	embryonic development ending in birth or egg hatching	GO:0009792	173	46	1.94338	1.22373	0.00446183	0.026105	1
Development	5	embryonic morphogenesis	GO:0048598	178	28	1.99955	0.744879	7.6785e-08	1.50499e-06	1
Development	5	regionalization	GO:0003002	127	18	1.42665	0.478851	1.39044e-06	2.01871e-05	1
Development	5	skeletal system development	GO:0001501	224	56	2.51629	1.48976	0.000260187	0.00226652	1
Development	5	nervous system development	GO:0007399	660	147	7.41406	3.91061	1.97302e-14	8.5936e-13	1
Development	5	organ development	GO:0048513	1052	360	11.8176	9.57702	0.000233996	0.00208469	1
Development	5	morphogenesis of a branching structure	GO:0001763	42	6	0.471804	0.159617	0.00691536	0.0376503	1
Development	5	cellular component morphogenesis	GO:0032989	258	64	2.89823	1.70258	7.15219e-05	0.000798596	1
Development	6	regulation of smooth muscle cell proliferation	GO:0048660	11	15	0.123568	0.399042	0.00394422	0.0290294	2
Development	6	cell fate specification	GO:0001708	37	1	0.415637	0.0266028	4.50349e-05	0.00083269	1
Development	6	cell fate determination	GO:0001709	26	2	0.292069	0.0532056	0.00638129	0.0424394	1
Development	6	negative regulation of cell differentiation	GO:0045596	120	23	1.34801	0.611865	0.00020888	0.00274528	1
Development	6	neurogenesis	GO:0022008	324	65	3.63963	1.72918	2.50973e-09	1.25943e-07	1
Development	6	chordate embryonic development	GO:0043009	172	45	1.93215	1.19713	0.00337267	0.0265959	1
Development	6	anterior/posterior pattern formation	GO:0009952	87	7	0.977308	0.18622	1.73725e-07	5.9935e-06	1
Development	6	somatic diversification of immune receptors	GO:0002200	10	16	0.112334	0.425645	0.000844794	0.00896781	2
Development	6	synapse assembly	GO:0007416	26	2	0.292069	0.0532056	0.00638129	0.0424394	1
Development	6	central nervous system development	GO:0007417	246	60	2.76342	1.59617	6.17808e-05	0.00103342	1
Development	6	regulation of nervous system development	GO:0051960	97	21	1.08964	0.558659	0.00435438	0.0316266	1
Development	6	organ morphogenesis	GO:0009887	464	124	5.21231	3.29875	1.79035e-06	4.94136e-05	1
Development	6	tissue development	GO:0009888	418	125	4.69557	3.32535	0.000447168	0.00560992	1
Development	6	sensory organ development	GO:0007423	138	26	1.55021	0.691673	4.67634e-05	0.00083269	1
Development	6	muscle organ development	GO:0007517	161	40	1.80858	1.06411	0.00180411	0.0158074	1
Development	6	respiratory tube development	GO:0030323	57	10	0.640306	0.266028	0.00696596	0.0448828	1
Development	6	embryonic organ development	GO:0048568	32	2	0.35947	0.0532056	0.00110002	0.0112447	1
Development	6	cell morphogenesis	GO:0000902	241	52	2.70726	1.38335	2.77712e-06	7.29986e-05	1
Development	6	cell part morphogenesis	GO:0032990	146	28	1.64008	0.744879	3.76785e-05	0.000742804	1
DNA/RNA metabolism and transcription	5	chromatin organization	GO:0006325	279	73	3.13413	1.94201	0.000145686	0.0013929	1
DNA/RNA metabolism and transcription	5	chromosome condensation	GO:0030261	4	18	0.0449337	0.478851	6.14103e-07	9.62913e-06	2
DNA/RNA metabolism and transcription	6	DNA metabolic process	GO:0006259	249	249	2.79712	6.6241	3.93774e-22	4.34726e-20	2
DNA/RNA metabolism and transcription	6	RNA metabolic process	GO:0016070	1634	597	18.3554	15.8819	0.000823044	0.00891618	1
DNA/RNA metabolism and transcription	6	ribonucleoprotein complex assembly	GO:0022618	22	24	0.247135	0.638468	0.0017289	0.0156451	2
DNA/RNA metabolism and transcription	6	protein-DNA complex assembly	GO:0065004	72	9	0.808807	0.239425	0.000119791	0.00174012	1
DNA/RNA metabolism and transcription	6	regulation of helicase activity	GO:0051095	1	6	0.0112334	0.159617	0.00356557	0.0277211	2
Immune system response	5	production of molecular mediator of immune response	GO:0002440	21	24	0.235902	0.638468	0.000917621	0.00719415	2
Immune system response	5	inflammatory response	GO:0006954	185	118	2.07818	3.13913	0.000563758	0.00461876	2
Immune system response	5	positive regulation of immune system process	GO:0002684	103	68	1.15704	1.80899	0.00524138	0.0297771	2
Immune system response	6	natural killer cell activation	GO:0030101	7	14	0.078634	0.372439	0.00049803	0.00572734	2
Immune system response	6	T cell activation	GO:0042110	79	71	0.887441	1.8888	5.36975e-06	0.000128874	2
Immune system response	6	B cell activation	GO:0042113	47	40	0.527971	1.06411	0.00135165	0.0133234	2
Immune system response	6	lymphocyte proliferation	GO:0046651	37	39	0.415637	1.03751	7.59959e-05	0.00119856	2
Immune system response	6	regulation of leukocyte activation	GO:0002694	64	60	0.71894	1.59617	1.10953e-05	0.000255191	2
Multicellular activities	5	smooth muscle cell proliferation	GO:0048659	12	16	0.134801	0.425645	0.00289632	0.0191731	2
Multicellular activities	5	cognition	GO:0050890	406	311	4.56077	8.27348	1.54923e-15	7.59124e-14	2
Multicellular activities	6	striated muscle contraction	GO:0006941	50	6	0.561672	0.159617	0.00108736	0.0112447	1
Regulation of intracellular processes and metabolism	5	regulation of biosynthetic process	GO:0009889	2069	544	23.242	14.4719	3.82234e-30	3.74589e-28	1
Regulation of intracellular processes and metabolism	5	regulation of cellular metabolic process	GO:0031323	2383	654	26.7693	17.3982	1.12261e-30	1.46688e-28	1
Regulation of intracellular processes and metabolism	5	regulation of nitrogen compound metabolic process	GO:0051171	2000	500	22.4669	13.3014	4.49318e-34	1.76133e-31	1
Regulation of intracellular processes and metabolism	5	regulation of macromolecule metabolic process	GO:0060255	2260	642	25.3876	17.079	4.3336e-25	3.39754e-23	1
Regulation of intracellular processes and metabolism	5	regulation of cell activation	GO:0050865	67	63	0.75264	1.67598	6.84548e-06	8.94476e-05	2
Regulation of intracellular processes and metabolism	5	negative regulation of catalytic activity	GO:0043086	135	84	1.51651	2.23464	0.00568287	0.0318241	2
Regulation of intracellular processes and metabolism	5	regulation of lyase activity	GO:0051339	63	8	0.707706	0.212823	0.000357066	0.00304282	1
Regulation of intracellular processes and metabolism	5	regulation of ligase activity	GO:0051340	39	37	0.438104	0.984304	0.000565562	0.00461876	2
Regulation of intracellular processes and metabolism	6	regulation of protein complex assembly	GO:0043254	54	8	0.606605	0.212823	0.00306946	0.0252887	1
Regulation of intracellular processes and metabolism	6	regulation of cellular biosynthetic process	GO:0031326	2061	542	23.1521	14.4187	5.52503e-30	1.52491e-27	1
Regulation of intracellular processes and metabolism	6	positive regulation of cell proliferation	GO:0008284	190	112	2.13435	2.97952	0.00501996	0.0350762	2
Regulation of intracellular processes and metabolism	6	positive regulation of cell activation	GO:0050867	41	42	0.460571	1.11732	8.61264e-05	0.0013206	2
Regulation of intracellular processes and metabolism	6	regulation of endothelial cell proliferation	GO:0001936	12	15	0.134801	0.399042	0.00532039	0.0362575	2
Regulation of intracellular processes and metabolism	6	regulation of fibroblast proliferation	GO:0048145	12	15	0.134801	0.399042	0.00532039	0.0362575	2
Regulation of intracellular processes and metabolism	6	negative regulation of homeostatic process	GO:0032845	5	10	0.0561672	0.266028	0.00333723	0.0265959	2
Regulation of intracellular processes and metabolism	6	positive regulation of homeostatic process	GO:0032846	8	13	0.0898674	0.345837	0.00278693	0.0233089	2
Regulation of intracellular processes and metabolism	6	negative regulation of lyase activity	GO:0051350	29	1	0.325769	0.0266028	0.000484581	0.00569125	1
Regulation of intracellular processes and metabolism	6	negative regulation of ligase activity	GO:0051352	29	34	0.325769	0.904496	7.31099e-05	0.00118696	2
Regulation of intracellular processes and metabolism	6	positive regulation of ligase activity	GO:0051351	33	35	0.370703	0.931099	0.000162067	0.00229387	2
Regulation of intracellular processes and metabolism	6	regulation of lipase activity	GO:0060191	63	11	0.707706	0.292631	0.00462151	0.0327061	1
Regulation of intracellular processes and metabolism	6	regulation of ubiquitin-protein ligase activity	GO:0051438	39	35	0.438104	0.931099	0.00133521	0.0133234	2
Regulation of transcription	6	regulation of nucleobase, nucleoside, nucleotide and nucleic acid metabolic process	GO:0019219	1984	495	22.2871	13.1684	5.21287e-34	2.87751e-31	1
Regulation of transcription	6	regulation of gene expression	GO:0010468	2012	530	22.6017	14.0995	4.93997e-29	9.08954e-27	1
Signal transduction	6	intracellular signaling pathway	GO:0007242	1101	303	12.368	8.06065	5.70032e-13	4.49511e-11	1
