# Supplementary material for: Modification of Gene Duplicability during the Evolution of Protein Interaction Network
Source: PLoS Comput Biol. 2011 Apr 7;7(4):e1002029. doi: 10.1371/journal.pcbi.1002029 (PMC3072358; doi:10.1371/journal.pcbi.1002029)
Supplement: Table S7 — Human miRNA targets. For each of the 986 human genes that are targets of miRNAs, the original source, type of experimental support and corresponding Pubmed ID(s) are displayed. SG, single-gene experiment; MA, microarray, MS, mass-spectrometry. 1 represents presence of the gene in the dataset or experimental data, 0 represents absence. (XLS) [file pcbi.1002029.s011.xls]

## Sheet: Table S7
Table S7: Human miRNA targets
Legend: For each of the 986 human genes that are targets of miRNAs, the original source, type of experimental support and corresponding Pubmed ID(s) are displayed. SG: single-gene experiment; MA: microarray; MS: mass-spectrometry. 1 represents presence of the gene in the dataset or experimental data, 0 represents absence
Entrez ID	Gene symbol	Tarbase v.5	miRecords v.1	SG	MA	MS	PMID1	PMID2	PMID3
3915	LAMC1	1	1	1	1	1	18668040	18390668	16549876
7057	thbs1	1	1	1	1	1	16239240	18668040	-
103	ADAR	1	1	1	1	1	15685193	18668040	-
9341	VAMP3	1	1	1	1	1	18042700	18668040	16549876
23670	tmem2	1	1	1	1	1	16239240	18668040	-
55832	TIP120A	1	1	1	1	1	18668040	15685193	-
80155	TBDN100	1	1	0	1	1	18668040	15685193	-
27236	ARFIP1	1	1	0	1	1	15685193	18668040	-
7866	IFRD2	1	1	0	1	1	15685193	18668040	-
378	ARF4	1	1	0	1	1	15685193	18668040	-
3725	JUN	1	1	0	1	1	18668040	18362358	-
4580	MTX1	1	1	0	1	1	15685193	18668040	-
558	AXL	1	1	0	1	1	15685193	18668040	-
5937	C2orf12	0	1	0	1	1	15685193	18668040	-
8683	SFRS9	1	1	0	1	1	15685193	18668040	-
22932	POM121	1	1	0	1	1	15685193	18668040	-
372	ARCN1	1	1	0	1	1	15685193	18668040	-
7171	TPM4	1	1	0	1	1	15685193	18668040	-
79073	MGC5508	1	1	0	1	1	18668040	15685193	-
4942	OAT	1	1	0	1	1	15685193	18668040	-
5557	PRIM1	1	1	0	1	1	18668040	18362358	-
647088	NP	1	1	0	1	1	15685193	18668040	-
29128	UHRF1	1	1	0	1	1	15685193	18668040	-
1912	PHC2	1	1	0	1	1	15685193	18668040	-
5725	PTBP1	1	1	0	1	1	15685193	18668040	-
56262	LRRC8	1	1	0	1	1	18668040	15685193	-
8407	TAGLN2	1	1	0	1	1	15685193	18668040	-
1655	DDX5	1	1	0	1	1	15685193	18668040	-
1665	DHX15	1	1	0	1	1	15685193	18668040	-
54964	FLJ20519	1	1	0	1	1	18668040	15685193	-
5420	PODXL	1	1	0	1	1	15685193	18668040	-
10487	CAP1	1	1	0	1	1	15685193	18668040	-
51497	TH1L	1	1	0	1	1	15685193	18668040	-
5236	PGM1	1	1	0	1	1	15685193	18668040	-
6856	SYPL	1	1	0	1	1	18668040	15685193	-
3304	HSPA1A	1	0	0	1	1	18668040	18362358	-
8731	MET	1	0	1	0	1	18456660	18668040	-
6541	CAT-1	1	1	1	0	1	18668040	18073344	-
7168	TPM1	1	1	1	0	1	18668040	17363372	-
4086	SMAD1	1	1	1	0	1	14697198	18197755	18668040
4651	MYO10	1	1	1	0	1	18668040	18042700	-
391	RHOG	1	1	1	0	1	18668040	18042700	-
9260	PDLIM7	1	1	1	0	1	18668040	18042700	-
2997	GYS1	1	1	1	0	1	18668040	18073344	-
10642	IMP-1	1	1	1	0	1	18413726	18668040	-
157506	RDH10	1	1	1	0	1	17724173	18668040	-
1956	EGFR	1	1	1	0	1	18668040	18483236	-
58155	nPTB	1	1	1	0	1	17210790	18668040	-
8266	G6PD	1	1	1	0	1	14697198	18668040	-
7490	Wt1	0	1	1	0	1	18362358	-	-
64866	CDCP1	1	0	0	0	1	18668040	-	-
387522	UBE2V1	1	0	0	0	1	18668040	-	-
10165	SLC25A13	1	0	0	0	1	18668040	-	-
51251	NT5C3	1	0	0	0	1	18668040	-	-
54491	FAM105A	1	0	0	0	1	18668040	-	-
58533	SNX6	1	0	0	0	1	18668040	-	-
8774	NAPG	1	0	0	0	1	18668040	-	-
11266	DUSP12	1	0	0	0	1	18668040	-	-
283237	TTC9C	1	0	0	0	1	18668040	-	-
5887	RAD23B	1	0	0	0	1	18668040	-	-
10962	MLLT11	1	0	0	0	1	18668040	-	-
79813	EHMT1	1	0	0	0	1	18668040	-	-
83693	HSDL1	1	0	0	0	1	18668040	-	-
8546	AP3B1	1	0	0	0	1	18668040	-	-
8797	TNFRSF10A	1	0	0	0	1	18668040	-	-
5432	POLR2C	1	0	0	0	1	18668040	-	-
23589	CARHSP1	1	0	0	0	1	18668040	-	-
55717	BRWD2	1	0	0	0	1	18668040	-	-
5510	PPP1R7	1	0	0	0	1	18668040	-	-
51715	RAB23	1	0	0	0	1	18668040	-	-
11230	PRAF2	1	0	0	0	1	18668040	-	-
23423	TMED3	1	0	0	0	1	18668040	-	-
134266	GRPEL2	1	0	0	0	1	18668040	-	-
57590	WDFY1	1	0	0	0	1	18668040	-	-
92745	SLC38A5	1	0	0	0	1	18668040	-	-
8878	SQSTM1	1	0	0	0	1	18668040	-	-
7127	TNFAIP2	1	0	0	0	1	18668040	-	-
6902	TBCA	1	0	0	0	1	18668040	-	-
10541	ANP32B	1	0	0	0	1	18668040	-	-
6386	SDCBP	1	0	0	0	1	18668040	-	-
114793	FMNL2	1	0	0	0	1	18668040	-	-
10953	TOMM34	1	0	0	0	1	18668040	-	-
3992	FADS1	1	0	0	0	1	18668040	-	-
3475	IFRD1	1	0	0	0	1	18668040	-	-
7916	BAT2	1	0	0	0	1	18668040	-	-
594	BCKDHB	1	0	0	0	1	18668040	-	-
2483	FRG1	1	0	0	0	1	18668040	-	-
388	RHOB	1	0	0	0	1	18668040	-	-
5792	PTPRF	1	0	0	0	1	18668040	-	-
92935	MARS2	1	0	0	0	1	18668040	-	-
10919	EHMT2	1	0	0	0	1	18668040	-	-
160	AP2A1	1	0	0	0	1	18668040	-	-
10611	PDLIM5	1	0	0	0	1	18668040	-	-
9522	SCAMP1	1	0	0	0	1	18668040	-	-
253558	LYCAT	1	0	0	0	1	18668040	-	-
3162	HMOX1	1	0	0	0	1	18668040	-	-
8744	TNFSF9	1	0	0	0	1	18668040	-	-
488	ATP2A2	1	0	0	0	1	18668040	-	-
55347	ABHD10	1	0	0	0	1	18668040	-	-
5874	RAB27B	1	0	0	0	1	18668040	-	-
8036	SHOC2	1	0	0	0	1	18668040	-	-
10438	LRP1	1	0	0	0	1	18668040	-	-
23224	SYNE2	1	0	0	0	1	18668040	-	-
535	ATP6V0A1	1	0	0	0	1	18668040	-	-
4144	MAT2A	1	0	0	0	1	18668040	-	-
23603	CORO1C	1	0	0	0	1	18668040	-	-
51495	PTPLAD1	1	0	0	0	1	18668040	-	-
5536	PPP5C	1	0	0	0	1	18668040	-	-
10672	GNA13	1	0	0	0	1	18668040	-	-
8161	COIL	1	0	0	0	1	18668040	-	-
27314	RAB30	1	0	0	0	1	18668040	-	-
7167	Tpi1	0	1	0	0	1	18362358	-	-
9076	CLDN1	1	0	0	0	1	18668040	-	-
9019	MPZL1	1	0	0	0	1	18668040	-	-
10238	WDR68	1	0	0	0	1	18668040	-	-
9354	UBE4A	1	0	0	0	1	18668040	-	-
4154	MBNL1	1	0	0	0	1	18668040	-	-
10542	HBXIP	1	0	0	0	1	18668040	-	-
1075	CTSC	1	0	0	0	1	18668040	-	-
117145	THEM4	1	0	0	0	1	18668040	-	-
26046	ZNF294	1	0	0	0	1	18668040	-	-
11313	LYPLA2	1	0	0	0	1	18668040	-	-
4670	HNRPM	1	0	0	0	1	18668040	-	-
55660	PRPF40A	1	0	0	0	1	18668040	-	-
5530	PPP3CA	1	0	0	0	1	18668040	-	-
64359	NXN	1	0	0	0	1	18668040	-	-
79665	DHX40	1	0	0	0	1	18668040	-	-
8301	PICALM	1	0	0	0	1	18668040	-	-
56655	POLE4	1	0	0	0	1	18668040	-	-
114971	DUSP23	1	0	0	0	1	18668040	-	-
5917	RARS	1	0	0	0	1	18668040	-	-
7837	PXDN	1	0	0	0	1	18668040	-	-
57714	KIAA1618	1	0	0	0	1	18668040	-	-
79814	AGMAT	1	0	0	0	1	18668040	-	-
8636	SSNA1	1	0	0	0	1	18668040	-	-
57678	GPAM	1	0	0	0	1	18668040	-	-
3159	HMGA1	1	0	0	0	1	18668040	-	-
81622	UNC93B1	1	0	0	0	1	18668040	-	-
375790	AGRN	1	0	0	0	1	18668040	-	-
2258	FGF2	1	0	0	0	1	18668040	-	-
8450	CUL4B	1	0	0	0	1	18668040	-	-
8417	STX7	1	0	0	0	1	18668040	-	-
57532	NUFIP2	1	0	0	0	1	18668040	-	-
10423	CDIPT	1	0	0	0	1	18668040	-	-
9351	SLC9A3R2	1	0	0	0	1	18668040	-	-
4552	MTRR	1	0	0	0	1	18668040	-	-
1499	CTNNB1	1	0	0	0	1	18668040	-	-
55687	TRMT1	1	0	0	0	1	18668040	-	-
54107	POLE3	1	0	0	0	1	18668040	-	-
23471	TRAM1	1	0	0	0	1	18668040	-	-
1977	EIF4E	1	0	0	0	1	18668040	-	-
5796	PTPRK	1	0	0	0	1	18668040	-	-
5347	PLK1	1	0	0	0	1	18668040	-	-
2147	F2	1	0	0	0	1	18668040	-	-
10557	RPP38	1	0	0	0	1	18668040	-	-
3035	HARS	1	0	0	0	1	18668040	-	-
3417	IDH1	1	0	0	0	1	18668040	-	-
6009	RHEB	1	0	0	0	1	18668040	-	-
90441	ZNF622	1	0	0	0	1	18668040	-	-
83858	ATAD3B	1	0	0	0	1	18668040	-	-
54742	LY6K	1	0	0	0	1	18668040	-	-
8974	P4HA2	1	0	0	0	1	18668040	-	-
5049	PAFAH1B2	1	0	0	0	1	18668040	-	-
79760	GEMIN7	1	0	0	0	1	18668040	-	-
8649	MAP2K1IP1	1	0	0	0	1	18668040	-	-
64778	FNDC3B	1	0	0	0	1	18668040	-	-
5870	RAB6A	1	0	0	0	1	18668040	-	-
3337	DNAJB1	1	0	0	0	1	18668040	-	-
2589	GALNT1	1	0	0	0	1	18668040	-	-
1834	DSP	1	0	0	0	1	18668040	-	-
347902	AMIGO2	1	0	0	0	1	18668040	-	-
4907	NT5E	1	0	0	0	1	18668040	-	-
51650	MRPS33	1	0	0	0	1	18668040	-	-
353376	TICAM2	1	0	0	0	1	18668040	-	-
84135	UTP15	1	0	0	0	1	18668040	-	-
10282	BET1	1	0	0	0	1	18668040	-	-
11137	PWP1	1	0	0	0	1	18668040	-	-
85476	GFM1	1	0	0	0	1	18668040	-	-
201562	PTPLB	1	0	0	0	1	18668040	-	-
8773	SNAP23	1	0	0	0	1	18668040	-	-
92675	HARS2	1	0	0	0	1	18668040	-	-
51060	TXNDC12	1	0	0	0	1	18668040	-	-
27338	UBE2S	1	0	0	0	1	18668040	-	-
5425	POLD2	1	0	0	0	1	18668040	-	-
9123	SLC16A3	1	0	0	0	1	18668040	-	-
10121	Actr1A	0	1	0	0	1	18362358	-	-
27154	BRPF3	1	0	0	0	1	18668040	-	-
2820	GPD2	1	0	0	0	1	18668040	-	-
4643	MYO1E	1	0	0	0	1	18668040	-	-
10558	SPTLC1	1	0	0	0	1	18668040	-	-
84188	MLSTD2	1	0	0	0	1	18668040	-	-
10802	SEC24A	1	0	0	0	1	18668040	-	-
10105	PPIF	1	0	0	0	1	18668040	-	-
4677	NARS	1	0	0	0	1	18668040	-	-
1371	CPOX	1	0	0	0	1	18668040	-	-
10971	YWHAQ	1	0	0	0	1	18668040	-	-
131118	DNAJC19	1	0	0	0	1	18668040	-	-
221079	ARL5B	1	0	0	0	1	18668040	-	-
5743	PTGS2	1	0	0	0	1	18668040	-	-
5795	PTPRJ	1	0	0	0	1	18668040	-	-
3673	ITGA2	1	0	0	0	1	18668040	-	-
23345	SYNE1	1	0	0	0	1	18668040	-	-
4023	LPL	1	0	0	0	1	18668040	-	-
283377	SPRYD4	1	0	0	0	1	18668040	-	-
117248	GALNT7	1	0	0	0	1	18668040	-	-
4343	MOV10	1	0	0	0	1	18668040	-	-
51479	ANKFY1	1	0	0	0	1	18668040	-	-
9289	GPR56	1	0	0	0	1	18668040	-	-
23647	ARFIP2	1	0	0	0	1	18668040	-	-
5493	PPL	1	0	0	0	1	18668040	-	-
9904	RBM19	1	0	0	0	1	18668040	-	-
64151	CAPG	1	0	0	0	1	18668040	-	-
84705	GTPBP3	1	0	0	0	1	18668040	-	-
57282	SLC4A10	1	0	0	0	1	18668040	-	-
5586	PKN2	1	0	0	0	1	18668040	-	-
6509	SLC1A4	1	0	0	0	1	18668040	-	-
144402	CPNE8	1	0	0	0	1	18668040	-	-
24138	IFIT5	1	0	0	0	1	18668040	-	-
51465	UBE2J1	1	0	0	0	1	18668040	-	-
51144	HSD17B12	1	0	0	0	1	18668040	-	-
53	ACP2	1	0	0	0	1	18668040	-	-
158747	MOSPD2	1	0	0	0	1	18668040	-	-
1465	CSRP1	1	0	0	0	1	18668040	-	-
10061	ABCF2	1	0	0	0	1	18668040	-	-
8795	TNFRSF10B	1	0	0	0	1	18668040	-	-
10979	PLEKHC1	1	0	0	0	1	18668040	-	-
9513	FXR2	1	0	0	0	1	18668040	-	-
22862	FNDC3A	1	0	0	0	1	18668040	-	-
85440	DOCK7	1	0	0	0	1	18668040	-	-
84823	LMNB2	1	0	0	0	1	18668040	-	-
11196	SEC23IP	1	0	0	0	1	18668040	-	-
51125	GOLGA7	1	0	0	0	1	18668040	-	-
9296	ATP6V1F	1	0	0	0	1	18668040	-	-
9342	SNAP29	1	0	0	0	1	18668040	-	-
10857	PGRMC1	1	0	0	0	1	18668040	-	-
60559	SPCS3	1	0	0	0	1	18668040	-	-
7779	SLC30A1	1	0	0	0	1	18668040	-	-
3691	ITGB4	1	0	0	0	1	18668040	-	-
781	CACNA2D1	1	0	0	0	1	18668040	-	-
11080	DNAJB4	1	0	0	0	1	18668040	-	-
7798	LUZP1	1	0	0	0	1	18668040	-	-
440026	TMEM41B	1	0	0	0	1	18668040	-	-
255520	ELMOD2	1	0	0	0	1	18668040	-	-
4070	TACSTD2	1	0	0	0	1	18668040	-	-
79065	ATG9A	1	0	0	0	1	18668040	-	-
9212	AURKB	1	0	0	0	1	18668040	-	-
865	CBFB	1	0	0	0	1	18668040	-	-
55052	MRPL20	1	0	0	0	1	18668040	-	-
94081	SFXN1	1	0	0	0	1	18668040	-	-
81034	SLC25A32	1	0	0	0	1	18668040	-	-
10972	TMED10	1	0	0	0	1	18668040	-	-
80755	AARSD1	1	0	0	0	1	18668040	-	-
5524	PPP2R4	1	0	0	0	1	18668040	-	-
55722	CEP72	1	0	0	0	1	18668040	-	-
5527	PPP2R5C	1	0	0	0	1	18668040	-	-
7298	TYMS	1	0	0	0	1	18668040	-	-
8829	NRP1	1	0	0	0	1	18668040	-	-
25828	TXN2	1	0	0	0	1	18668040	-	-
5479	PPIB	1	0	0	0	1	18668040	-	-
9902	MRC2	1	0	0	0	1	18668040	-	-
4853	NOTCH2	1	0	0	0	1	18668040	-	-
23657	SLC7A11	1	0	0	0	1	18668040	-	-
2771	GNAI2	1	0	0	0	1	18668040	-	-
10959	TMED2	1	0	0	0	1	18668040	-	-
5761	PTMA	1	0	0	0	1	18668040	-	-
2673	GFPT1	1	0	0	0	1	18668040	-	-
9415	FADS2	1	0	0	0	1	18668040	-	-
10280	OPRS1	1	0	0	0	1	18668040	-	-
8289	ARID1A	1	0	0	0	1	18668040	-	-
159	ADSS	1	0	0	0	1	18668040	-	-
10797	MTHFD2	1	0	0	0	1	18668040	-	-
5534	PPP3R1	1	0	0	0	1	18668040	-	-
5878	RAB5C	1	0	0	0	1	18668040	-	-
83440	ADPGK	1	0	0	0	1	18668040	-	-
5139	PDE3A	1	0	0	0	1	18668040	-	-
6801	STRN	1	0	0	0	1	18668040	-	-
10484	SEC23A	1	0	0	0	1	18668040	-	-
79188	TMEM43	1	0	0	0	1	18668040	-	-
26973	CHORDC1	1	0	0	0	1	18668040	-	-
83451	ABHD11	1	0	0	0	1	18668040	-	-
90957	DHX57	1	0	0	0	1	18668040	-	-
9497	SLC4A7	1	0	0	0	1	18668040	-	-
22954	TRIM32	1	0	0	0	1	18668040	-	-
302	ANXA2	1	0	0	0	1	18668040	-	-
1453	CSNK1D	1	0	0	0	1	18668040	-	-
402	ARL2	1	0	0	0	1	18668040	-	-
57142	RTN4	1	0	0	0	1	18668040	-	-
4734	NEDD4	1	0	0	0	1	18668040	-	-
29099	COMMD9	1	0	0	0	1	18668040	-	-
64951	MRPS24	1	0	0	0	1	18668040	-	-
23339	VPS39	1	0	0	0	1	18668040	-	-
29968	PSAT1	1	0	0	0	1	18668040	-	-
10241	CALCOCO2	1	0	0	0	1	18668040	-	-
51654	CDK5RAP1	1	0	0	0	1	18668040	-	-
1051	CEBPB	1	0	0	0	1	18668040	-	-
4924	NUCB1	1	0	0	0	1	18668040	-	-
9526	MPDU1	1	0	0	0	1	18668040	-	-
23376	KIAA0776	1	0	0	0	1	18668040	-	-
5813	PURA	1	0	0	0	1	18668040	-	-
79711	IPO4	1	0	0	0	1	18668040	-	-
23649	POLA2	1	0	0	0	1	18668040	-	-
7368	UGT8	1	0	0	0	1	18668040	-	-
546	ATRX	1	0	0	0	1	18668040	-	-
10490	VTI1B	1	0	0	0	1	18668040	-	-
84230	LRRC8C	1	0	0	0	1	18668040	-	-
1393	Crhbp	0	1	0	0	1	18362358	-	-
58477	SRPRB	1	0	0	0	1	18668040	-	-
1595	CYP51A1	1	0	0	0	1	18668040	-	-
64682	ANAPC1	1	0	0	0	1	18668040	-	-
25840	METTL7A	1	0	0	0	1	18668040	-	-
64422	ATG3	1	0	0	0	1	18668040	-	-
51209	Rab9B	0	1	0	0	1	18362358	-	-
9070	ASH2L	1	0	0	0	1	18668040	-	-
9319	TRIP13	1	0	0	0	1	18668040	-	-
81539	SLC38A1	1	0	0	0	1	18668040	-	-
138428	PTRH1	1	0	0	0	1	18668040	-	-
79751	SLC25A22	1	0	0	0	1	18668040	-	-
9528	TMEM59	1	0	0	0	1	18668040	-	-
5738	PTGFRN	1	0	0	0	1	18668040	-	-
80279	CDK5RAP3	1	0	0	0	1	18668040	-	-
51616	TAF9B	1	0	0	0	1	18668040	-	-
10036	CHAF1A	1	0	0	0	1	18668040	-	-
54499	TMCO1	1	0	0	0	1	18668040	-	-
84191	FAM96A	1	0	0	0	1	18668040	-	-
54552	GNL3L	1	0	0	0	1	18668040	-	-
2580	GAK	1	0	0	0	1	18668040	-	-
140707	BRI3BP	1	0	0	0	1	18668040	-	-
5270	SERPINE2	1	0	0	0	1	18668040	-	-
771	CA12	1	0	0	0	1	18668040	-	-
3891	KRTHB5	1	0	0	0	1	18668040	-	-
6560	SLC12A4	1	0	0	0	1	18668040	-	-
23378	KIAA0409	1	0	0	0	1	18668040	-	-
3783	KCNN4	1	0	0	0	1	18668040	-	-
5584	PRKCI	1	0	0	0	1	18668040	-	-
57552	AADACL1	1	0	0	0	1	18668040	-	-
10942	PRSS21	1	0	0	0	1	18668040	-	-
6558	SLC12A2	1	0	0	0	1	18668040	-	-
124540	MSI2	1	0	0	0	1	18668040	-	-
3482	IGF2R	1	0	0	0	1	18668040	-	-
2948	GSTM4	1	0	0	0	1	18668040	-	-
4298	MLLT1	1	0	0	0	1	18668040	-	-
8799	PEX11B	1	0	0	0	1	18668040	-	-
6675	UAP1	1	0	0	0	1	18668040	-	-
26064	RAI14	1	0	0	0	1	18668040	-	-
23677	SH3BP4	1	0	0	0	1	18668040	-	-
54901	CDKAL1	1	0	0	0	1	18668040	-	-
27243	CHMP2A	1	0	0	0	1	18668040	-	-
29957	SLC25A24	1	0	0	0	1	18668040	-	-
64841	GNPNAT1	1	0	0	0	1	18668040	-	-
1105	CHD1	1	0	0	0	1	18668040	-	-
29952	DPP7	1	0	0	0	1	18668040	-	-
23761	PISD	1	0	0	0	1	18668040	-	-
7474	WNT5A	1	0	0	0	1	18668040	-	-
10270	AKAP8	1	0	0	0	1	18668040	-	-
54407	SLC38A2	1	0	0	0	1	18668040	-	-
83871	RAB34	1	0	0	0	1	18668040	-	-
25963	TMEM87A	1	0	0	0	1	18668040	-	-
90102	PHLDB2	1	0	0	0	1	18668040	-	-
1444	Cshl1	0	1	0	0	1	18362358	-	-
6734	SRPR	1	0	0	0	1	18668040	-	-
7170	TPM3	1	0	0	0	1	18668040	-	-
4691	NCL	1	0	0	0	1	18668040	-	-
80005	DOCK5	1	0	0	0	1	18668040	-	-
91869	RFT1	1	0	0	0	1	18668040	-	-
290	ANPEP	1	0	0	0	1	18668040	-	-
3839	KPNA3	1	0	0	0	1	18668040	-	-
83442	SH3BGRL3	1	0	0	0	1	18668040	-	-
396	ARHGDIA	1	0	0	0	1	18668040	-	-
79922	MRM1	1	0	0	0	1	18668040	-	-
10231	RCN2	1	0	0	0	1	18668040	-	-
23129	PLXND1	1	0	0	0	1	18668040	-	-
143888	KDELC2	1	0	0	0	1	18668040	-	-
57410	SCYL1	1	0	0	0	1	18668040	-	-
7095	TLOC1	1	0	0	0	1	18668040	-	-
8943	AP3D1	1	0	0	0	1	18668040	-	-
29901	SAC3D1	1	0	0	0	1	18668040	-	-
24145	PANX1	1	0	0	0	1	18668040	-	-
285598	ARL10	1	0	0	0	1	18668040	-	-
4883	NPR3	1	0	0	0	1	18668040	-	-
1829	DSG2	1	0	0	0	1	18668040	-	-
90522	YIF1B	1	0	0	0	1	18668040	-	-
128239	IQGAP3	1	0	0	0	1	18668040	-	-
6576	SLC25A1	1	0	0	0	1	18668040	-	-
7296	TXNRD1	1	0	0	0	1	18668040	-	-
7169	TPM2	1	0	0	0	1	18668040	-	-
23186	RCOR1	1	0	0	0	1	18668040	-	-
9125	RQCD1	1	0	0	0	1	18668040	-	-
64757	MOSC1	1	0	0	0	1	18668040	-	-
528	ATP6V1C1	1	0	0	0	1	18668040	-	-
1050	CEBPA	1	1	1	1	0	15685193	18451139	-
1021	CDK6	1	1	1	1	0	15685193	16239240	18406353
578	BAK1	0	1	1	1	0	18056640	-	-
4170	MCL1	1	1	1	1	0	17404574	18362358	18381414
27250	PDCD4	1	1	1	1	0	17968323	17991735	15685193
2194	FAS	0	1	1	1	0	17991735	-	-
8763	CD164	1	1	1	1	0	16549876	15685193	-
5970	RELA	1	1	1	1	0	15685193	-	-
3796	KIF2	1	1	1	1	0	15685193	-	-
8677	STX10	1	1	1	1	0	15685193	18042700	-
3570	IL-6R	0	1	1	1	0	17991735	-	-
1073	CFL2	1	1	1	1	0	15685193	17991735	-
10447	FAM3C	0	1	1	1	0	17991735	-	-
10449	ACAA2	1	1	1	1	0	16549876	15685193	-
27244	SESN1	0	1	1	1	0	17991735	-	-
113263	Glcci1	0	1	1	1	0	17991735	-	-
7846	tuba3	1	1	1	1	0	16239240	-	-
7832	BPPRII	0	1	1	1	0	17991735	-	-
58190	CTDSP1	1	1	1	1	0	18042700	15685193	-
9057	slc7a6	1	1	1	1	0	16239240	-	-
51098	C20orf9	1	1	1	1	0	15685193	-	-
81831	NETO2	1	1	1	1	0	15685193	-	-
10114	HIPK3	1	1	1	1	0	17575136	17991735	-
8801	SUCLG2	1	1	1	1	0	16549876	-	-
79056	PRRG4	0	1	1	1	0	17991735	-	-
3491	cyr61	1	1	1	1	0	16239240	-	-
9655	SOCS5	0	1	1	1	0	17991735	-	-
55591	vezatin	1	1	1	1	0	16239240	-	-
8826	IQGAP1	1	1	1	1	0	15685193	-	-
390916	RP2	0	1	1	1	0	17991735	-	-
27230	SERP1	1	1	1	1	0	16549876	15685193	-
57645	POGK	1	1	1	1	0	15685193	-	-
23678	SGK3	0	1	1	1	0	17991735	-	-
5268	SERPINB5	1	1	1	1	0	15685193	18270520	-
317	APAF1	0	1	1	1	0	17991735	-	-
1432	MAPK14	1	1	1	1	0	15131085	15806104	15685193
1545	CYP1B1	1	1	1	1	0	15685193	16982751	-
8935	SCAP2	0	1	1	1	0	18362358	-	-
80335	pro2730	1	1	1	1	0	16239240	-	-
8992	ATP6V0E	1	1	1	1	0	16549876	15685193	-
11334	TUSC2	1	0	1	1	0	18077375	15685193	-
6566	SLC16A1	1	1	1	1	0	17322061	16549876	15685193
10634	GAS2L1	1	1	1	1	0	16549876	18042700	-
55276	PGM2	1	1	1	1	0	15685193	-	-
59	ACTA2	0	1	1	1	0	17991735	-	-
117247	SLC16A10	0	1	1	1	0	17991735	-	-
11159	RABL2A	1	1	0	1	0	15685193	-	-
5284	PIGR	0	1	0	1	0	18056640	-	-
64834	ELOVL1	1	1	0	1	0	15685193	-	-
57451	ODZ2	0	1	0	1	0	18056640	-	-
2070	EYA4	1	1	0	1	0	15685193	-	-
10040	TOM1L1	1	1	0	1	0	15685193	-	-
10053	AP1M2	1	1	0	1	0	15685193	-	-
10783	NEK6	1	1	0	1	0	15685193	-	-
283349	RASSF5	1	1	0	1	0	15685193	-	-
9910	RABGAP1L	1	1	0	1	0	15685193	-	-
1785	DNM2	1	1	0	1	0	15685193	-	-
339924	LOC339924	1	1	0	1	0	15685193	-	-
84527	ZNF559	0	1	0	1	0	18362358	-	-
133015	MGC29898	1	1	0	1	0	15685193	-	-
55974	LOC55974	1	1	0	1	0	15685193	-	-
9144	SYNGR2	1	1	0	1	0	15685193	-	-
132789	GNPDA2	1	1	0	1	0	15685193	-	-
22876	INPP5F	1	1	0	1	0	15685193	-	-
11158	RABL2B	1	1	0	1	0	15685193	-	-
5269	SERPINB6	1	1	0	1	0	15685193	-	-
57542	KIAA1340	1	1	0	1	0	15685193	-	-
6041	RNASEL	0	1	0	1	0	18362358	-	-
10146	G3BP	1	1	0	1	0	15685193	-	-
29899	GPSM2	1	1	0	1	0	15685193	-	-
9414	TJP2	1	1	0	1	0	15685193	-	-
7023	TFAP4	1	1	0	1	0	15685193	-	-
966	CD59	1	1	0	1	0	15685193	-	-
7367	UGT2B17	0	1	0	1	0	18056640	-	-
51306	C5orf5	1	1	0	1	0	15685193	-	-
51631	LUC7L2	1	1	0	1	0	15685193	-	-
79794	FLJ21415	1	1	0	1	0	15685193	-	-
6894	TARBP1	1	1	0	1	0	15685193	-	-
93081	LOC93081	1	1	0	1	0	15685193	-	-
6936	C2orf3	1	1	0	1	0	15685193	-	-
57472	KIAA1194	1	1	0	1	0	15685193	-	-
9818	NUPL1	1	1	0	1	0	15685193	-	-
57698	KIAA1598	1	1	0	1	0	15685193	-	-
2054	EPIM	1	1	0	1	0	15685193	-	-
84079	ANKRD27	1	1	0	1	0	15685193	-	-
9060	PAPSS2	1	1	0	1	0	15685193	-	-
93973	ACTR8	1	1	0	1	0	15685193	-	-
4627	MYH9	1	1	0	1	0	15685193	-	-
1389	CREBL2	0	1	0	1	0	18362358	-	-
84617	MGC4083	1	1	0	1	0	15685193	-	-
54467	ANKIB1	1	1	0	1	0	15685193	-	-
8895	CPNE3	1	1	0	1	0	15685193	-	-
10095	ARPC1B	1	1	0	1	0	15685193	-	-
4001	LMNB1	1	1	0	1	0	15685193	-	-
7769	ZNF226	1	1	0	1	0	15685193	-	-
80254	Cep63	0	1	0	1	0	18362358	-	-
64065	PERP	0	1	0	1	0	18056640	-	-
6584	SLC22A5	1	1	0	1	0	15685193	-	-
5378	PMS1	0	1	0	1	0	18362358	-	-
56126	PCDHB10	0	1	0	1	0	18056640	-	-
653145	ANXA8	1	1	0	1	0	15685193	-	-
10553	HTATIP2	1	1	0	1	0	15685193	-	-
92370	ACPL2	1	1	0	1	0	15685193	-	-
117581	TWIST2	1	1	0	1	0	15685193	-	-
23097	CDK11	1	1	0	1	0	15685193	-	-
26996	GPR160	0	1	0	1	0	18056640	-	-
147381	CBLN2	0	1	0	1	0	18056640	-	-
253512	SLC25A30	1	1	0	1	0	15685193	-	-
123016	TTC8	1	1	0	1	0	15685193	-	-
124930	FLJ25555	1	1	0	1	0	15685193	-	-
51141	INSIG2	1	1	0	1	0	15685193	-	-
9422	ZNF264	1	1	0	1	0	15685193	-	-
6385	SDC4	1	1	0	1	0	15685193	-	-
80306	EG1	1	1	0	1	0	15685193	-	-
3398	ID2	0	1	0	1	0	18056640	-	-
51447	IHPK2	1	1	0	1	0	15685193	-	-
140809	C20orf139	1	1	0	1	0	15685193	-	-
8879	SGPL1	0	1	0	1	0	18056640	-	-
9138	ARHGEF1	1	1	0	1	0	15685193	-	-
10455	PECI	1	1	0	1	0	15685193	-	-
23189	ANKRD15	1	1	0	1	0	15685193	-	-
23593	HEBP2	1	1	0	1	0	15685193	-	-
54545	PIP3AP	1	1	0	1	0	15685193	-	-
54969	FLJ20534	0	1	0	1	0	18362358	-	-
3399	ID3	0	1	0	1	0	18056640	-	-
26119	ARH	1	1	0	1	0	15685193	-	-
22841	RAB11FIP2	1	1	0	1	0	15685193	-	-
51000	SLC35B3	0	1	0	1	0	18362358	-	-
1677	DFFB	1	1	0	1	0	15685193	-	-
23321	TRIM2	1	1	0	1	0	15685193	-	-
2199	FBLN2	1	1	0	1	0	15685193	-	-
9939	RBM8A	0	1	0	1	0	18056640	-	-
50848	F11R	1	1	0	1	0	15685193	-	-
8358	HIST1H3B	1	1	0	1	0	15685193	-	-
407738	FAM19A1	0	1	0	1	0	18056640	-	-
286077	FLJ46072	1	1	0	1	0	15685193	-	-
10950	BTG3	1	1	0	1	0	15685193	-	-
221294	NT5C2L1	0	1	0	1	0	18362358	-	-
53358	RAI	1	1	0	1	0	15685193	-	-
23446	CDW92	1	1	0	1	0	15685193	-	-
79085	SLC25A23	1	1	0	1	0	15685193	-	-
4603	MYBL1	1	1	0	1	0	15685193	-	-
219333	USP12	1	1	0	1	0	15685193	-	-
84333	RNF159	1	1	0	1	0	15685193	-	-
1019	CDK4	1	1	0	1	0	15685193	-	-
55707	FLJ10420	1	1	0	1	0	15685193	-	-
25987	E2IG4	1	1	0	1	0	15685193	-	-
84951	CTEN	1	1	0	1	0	15685193	-	-
195828	CDC14B	1	1	0	1	0	15685193	18362358	-
199699	SP1	1	0	0	1	0	15685193	-	-
8754	ADAM9	1	1	0	1	0	15685193	-	-
1500	CTNND1	1	1	0	1	0	15685193	-	-
64172	OSGEPL1	0	1	0	1	0	18362358	-	-
64857	CLG	1	1	0	1	0	15685193	-	-
57461	KIAA1160	1	1	0	1	0	15685193	-	-
219654	C10orf56	1	1	0	1	0	15685193	-	-
1063	CENPF	1	1	0	1	0	15685193	-	-
54978	C2orf18	1	1	0	1	0	15685193	-	-
4735	NEDD5	1	1	0	1	0	15685193	-	-
55252	ASXL2	0	1	0	1	0	18362358	-	-
54482	FLJ10287	0	1	0	1	0	18362358	-	-
29083	HSPC135	1	1	0	1	0	15685193	-	-
2965	GTF2H1	0	1	0	1	0	18362358	-	-
29969	HIC	1	1	0	1	0	15685193	-	-
79815	FLJ13955	0	1	0	1	0	18362358	-	-
84064	HDHD2	0	1	0	1	0	18362358	-	-
10198	MPHOSPH9	1	1	0	1	0	15685193	-	-
25862	MGC20741	1	1	0	1	0	15685193	-	-
9455	HOMER2	0	1	0	1	0	18056640	-	-
93487	C14orf32	1	1	0	1	0	15685193	-	-
55048	FLJ20847	1	1	0	1	0	15685193	-	-
147463	ANKRD29	1	1	0	1	0	15685193	-	-
55357	TBC1D2	1	1	0	1	0	15685193	-	-
369	ARAF1	1	1	0	1	0	15685193	-	-
81628	THG-1	1	1	0	1	0	15685193	-	-
56935	FN5	1	1	0	1	0	15685193	-	-
3397	ID1	0	1	0	1	0	18056640	-	-
7360	UGP2	0	1	0	1	0	18362358	-	-
51167	NCB5OR	1	1	0	1	0	15685193	-	-
5218	PFTK1	1	1	0	1	0	15685193	-	-
23478	SPC18	1	1	0	1	0	15685193	-	-
10247	HRSP12	0	1	0	1	0	18362358	-	-
10106	CTDSP2	1	1	0	1	0	15685193	-	-
6591	SNAI2	1	1	0	1	0	15685193	-	-
1856	DVL2	1	1	0	1	0	15685193	-	-
650669	AK123478	0	1	0	1	0	18056640	-	-
3486	IGFBP3	0	1	0	1	0	18056640	-	-
115209	OMA1	0	1	0	1	0	18362358	-	-
1182	CLCN3	1	1	0	1	0	15685193	-	-
6744	SSFA2	1	1	0	1	0	15685193	-	-
126731	LOC126731	1	1	0	1	0	15685193	-	-
9107	MTMR6	1	1	0	1	0	15685193	-	-
221656	AOF1	1	1	0	1	0	15685193	-	-
90488	MGC17943	1	1	0	1	0	15685193	-	-
146223	CKLFSF4	1	1	0	1	0	15685193	-	-
26147	PHF19	1	1	0	1	0	15685193	-	-
63898	SH2D4A	1	1	0	1	0	15685193	-	-
9559	VPS26	1	1	0	1	0	15685193	-	-
7126	TNFAIP1	1	1	0	1	0	15685193	-	-
285590	KIAA1295	1	0	0	1	0	15685193	-	-
7366	UGT2B15	0	1	0	1	0	18056640	-	-
9516	LITAF	1	1	0	1	0	15685193	-	-
26258	PLDN	1	1	0	1	0	15685193	-	-
10622	POLR3G	1	1	0	1	0	15685193	-	-
9308	CD83	1	1	0	1	0	15685193	-	-
55536	RAM2	1	1	0	1	0	15685193	-	-
55069	FLJ10099	1	1	0	1	0	15685193	-	-
23214	XPO6	1	1	0	1	0	15685193	-	-
10015	PDCD6IP	0	1	0	1	0	18362358	-	-
64855	C9orf88	1	1	0	1	0	15685193	-	-
27242	TNFRSF21	1	1	0	1	0	15685193	-	-
89781	HPS4	1	1	0	1	0	15685193	-	-
4090	SMAD5	1	1	0	1	0	15685193	-	-
7329	UBE2I	0	1	0	1	0	18056640	-	-
1543	CYP1A1	0	1	0	1	0	18056640	-	-
1490	CTGF	1	1	0	1	0	15685193	-	-
4124	MAN2A1	1	1	0	1	0	15685193	-	-
388536	MGC62100	1	1	0	1	0	15685193	-	-
64396	GCL	1	1	0	1	0	15685193	-	-
55872	TOPK	1	1	0	1	0	15685193	-	-
5257	PHKB	0	1	0	1	0	18362358	-	-
3021	H3F3B	1	1	0	1	0	15685193	18056640	18362358
26503	SLC17A5	1	1	0	1	0	15685193	-	-
2773	GNAI3	1	1	0	1	0	15685193	-	-
2000	ELF4	1	1	0	1	0	15685193	-	-
57491	AHRR	1	1	0	1	0	15685193	-	-
283635	C14orf24	1	1	0	1	0	15685193	-	-
116254	C6orf72	1	1	0	1	0	15685193	-	-
84263	HSDL2	0	1	0	1	0	18362358	-	-
54502	FLJ20273	1	1	0	1	0	15685193	-	-
159091	LOC159091	0	1	0	1	0	18362358	-	-
2790	GNG10	1	1	0	1	0	15685193	-	-
91754	NEK9	1	1	0	1	0	15685193	-	-
3688	ITGB1	1	1	0	1	0	15685193	-	-
91749	KIAA1919	1	1	0	1	0	15685193	-	-
23650	TRIM29	1	1	0	1	0	15685193	-	-
114825	KIAA1935	0	1	0	1	0	18362358	-	-
51759	C9orf78	1	1	0	1	0	15685193	-	-
79850	CT120	1	1	0	1	0	15685193	-	-
5440	POLR2K	1	1	0	1	0	15685193	-	-
1718	DHCR24	1	1	0	1	0	15685193	-	-
2683	B4GALT1	1	1	0	1	0	15685193	-	-
9493	KIF23	1	1	0	1	0	15685193	-	-
55008	HERC6	0	1	0	1	0	18362358	-	-
51182	HSPA14	1	1	0	1	0	15685193	-	-
284996	RNF149	1	1	0	1	0	15685193	-	-
4436	MSH2	0	1	0	1	0	18362358	-	-
220963	SLC16A9	1	1	0	1	0	15685193	-	-
56674	C11orf15	1	1	0	1	0	15685193	-	-
125476	C18orf37	1	1	0	1	0	15685193	-	-
119504	C10orf104	0	1	0	1	0	18056640	18362358	-
388650	LOC388650	0	1	0	1	0	18362358	-	-
283373	FLJ34236	1	1	0	1	0	15685193	-	-
23531	MMD	1	1	0	1	0	15685193	-	-
5782	PTPN12	1	1	0	1	0	15685193	-	-
1635	DCTD	1	1	0	1	0	15685193	-	-
754	PTTG1IP	1	1	0	1	0	15685193	-	-
326626	PTMAP7	1	1	0	1	0	15685193	-	-
2643	GCH1	1	1	0	1	0	15685193	-	-
171177	CHP	1	1	0	1	0	15685193	-	-
1054	CEBPG	0	1	0	1	0	18056640	-	-
151516	FLJ25084	1	1	0	1	0	15685193	-	-
121260	SLC15A4	1	1	0	1	0	15685193	-	-
8354	HIST1H3I	0	1	0	1	0	15685193	-	-
8359	HIST1H4A	0	1	0	1	0	18056640	-	-
10904	BLCAP	1	1	0	1	0	15685193	-	-
5756	PTK9	1	1	0	1	0	15685193	-	-
11104	KATNA1	1	1	0	1	0	15685193	-	-
5355	PLP2	1	1	0	1	0	15685193	-	-
377	ARF3	1	1	0	1	0	15685193	-	-
114881	OSBPL7	1	1	0	1	0	15685193	-	-
92270	MGC138396	0	1	0	1	0	18056640	-	-
64114	PP1201	1	1	0	1	0	15685193	-	-
220323	NS5ATP13TP2	1	1	0	1	0	15685193	-	-
57580	PREX1	1	1	0	1	0	15685193	-	-
5411	PNN	0	1	0	1	0	18362358	-	-
27436	EML4	1	1	0	1	0	15685193	-	-
51199	NIN	1	1	0	1	0	15685193	-	-
11177	BAZ1A	1	1	0	1	0	15685193	-	-
5889	RAD51C	0	1	0	1	0	18362358	-	-
128486	C20orf142	1	1	0	1	0	15685193	-	-
23608	MKRN1	1	1	0	1	0	15685193	-	-
23492	CBX7	0	1	0	1	0	18056640	-	-
57531	HACE1	0	1	0	1	0	18362358	-	-
57088	TRA1	0	1	0	1	0	18362358	-	-
50650	ARHGEF3	1	1	0	1	0	15685193	-	-
55635	DEPDC1	1	1	0	1	0	15685193	-	-
113189	D4ST1	1	1	0	1	0	15685193	-	-
54908	FLJ20364	1	1	0	1	0	15685193	-	-
10459	MAD2L2	1	1	0	1	0	15685193	-	-
7103	TSPAN8	0	1	0	1	0	18056640	-	-
55835	CENPJ	0	1	0	1	0	18362358	-	-
55332	FLJ11259	1	1	0	1	0	15685193	-	-
9055	PRC1	1	1	0	1	0	15685193	-	-
4833	NME4	1	1	0	1	0	15685193	-	-
157247	MGC27345	1	1	0	1	0	15685193	-	-
4276	MICA	1	1	0	1	0	15685193	-	-
57140	RNPEPL1	1	1	0	1	0	15685193	-	-
55227	LRRC1	1	1	0	1	0	15685193	-	-
55288	RHOT1	0	1	0	1	0	18362358	-	-
7078	TIMP3	1	1	0	1	0	15685193	-	-
3033	HADHSC	1	1	0	1	0	15685193	-	-
11244	ZHX1	1	1	0	1	0	15685193	-	-
51444	RNF138	1	1	0	1	0	15685193	-	-
6259	RYK	1	1	0	1	0	15685193	-	-
8676	STX11	1	1	0	1	0	15685193	-	-
3720	JMJ	0	1	0	1	0	18056640	-	-
6789	STK4	1	1	0	1	0	15685193	-	-
84327	ZBED3	1	1	0	1	0	15685193	-	-
116064	LOC116064	1	1	0	1	0	15685193	-	-
1735	DIO3	0	1	0	1	0	18056640	-	-
7358	UGDH	0	1	0	1	0	18362358	-	-
9510	ADAMTS1	0	1	0	1	0	18056640	-	-
84196	USP48	1	1	0	1	0	15685193	-	-
148867	SLC30A7	1	1	0	1	0	15685193	-	-
79443	FYCO1	1	1	0	1	0	15685193	-	-
3032	HADHB	1	1	0	1	0	15685193	-	-
29956	LASS2	1	1	0	1	0	15685193	-	-
55775	TDP1	1	1	0	1	0	15685193	-	-
51062	GBP3	1	1	0	1	0	15685193	-	-
857	CAV1	1	1	0	1	0	15685193	-	-
83879	CDCA7	1	1	0	1	0	15685193	-	-
51099	ABHD5	1	1	0	1	0	15685193	-	-
2934	GSN	1	1	0	1	0	15685193	-	-
100133941	CD24	1	1	0	1	0	15685193	-	-
64215	DNAJC1	1	1	0	1	0	15685193	-	-
1191	CLU	0	1	0	1	0	18056640	-	-
9411	PARG1	1	1	0	1	0	15685193	-	-
201973	FLJ33167	0	1	0	1	0	18362358	-	-
60526	FLJ21820	0	1	0	1	0	18362358	-	-
10090	UST	1	1	0	1	0	15685193	-	-
3927	LASP1	1	1	0	1	0	15685193	-	-
50515	CHST11	1	1	0	1	0	15685193	-	-
204	AK2	1	1	0	1	0	15685193	-	-
7094	TLN1	1	1	0	1	0	15685193	-	-
51035	LOC51035	1	1	0	1	0	15685193	-	-
7072	TIA1	0	1	0	1	0	18362358	-	-
79832	FLJ21924	1	1	0	1	0	15685193	-	-
63929	LOC63929	1	1	0	1	0	15685193	-	-
22856	CHSY1	1	1	0	1	0	15685193	-	-
145773	MGC26690	1	1	0	1	0	15685193	-	-
9321	TRIP11	1	1	0	1	0	15685193	-	-
26175	C14orf109	0	1	0	1	0	18362358	-	-
27301	APEX2	1	1	0	1	0	15685193	-	-
51228	GLTP	1	1	0	1	0	15685193	-	-
223	ALDH9A1	1	1	0	1	0	15685193	-	-
23370	ARHGEF18	1	1	0	1	0	15685193	-	-
149420	LOC149420	1	1	0	1	0	15685193	-	-
55327	LIN7C	1	1	0	1	0	15685193	-	-
9709	HERPUD1	1	1	0	1	0	15685193	-	-
27095	TRAPPC3	1	1	0	1	0	15685193	-	-
115548	FCHO2	1	1	0	1	0	15685193	-	-
28978	TMEM14A	1	1	0	1	0	15685193	-	-
2631	GBAS	1	1	0	1	0	15685193	-	-
5916	RARG	1	1	0	1	0	15685193	-	-
64764	CREB3L2	1	1	0	1	0	15685193	-	-
54585	LZTFL1	1	1	0	1	0	15685193	-	-
7106	TM4SF7	1	1	0	1	0	15685193	-	-
55041	PLEKHB2	1	1	0	1	0	15685193	-	-
54566	EPB41L4B	1	1	0	1	0	15685193	-	-
3557	IL1RN	0	1	0	1	0	18056640	-	-
59349	KLHL12	1	1	0	1	0	15685193	-	-
8705	B3GALT4	0	1	0	1	0	18056640	-	-
440270	GOLGA5	0	1	0	1	0	18362358	-	-
7456	WASPIP	0	1	0	1	0	18362358	-	-
55862	ECHDC1	0	1	0	1	0	18362358	-	-
22934	RPIA	1	1	0	1	0	15685193	-	-
10424	PGRMC2	1	1	0	1	0	15685193	-	-
55204	GOLPH3L	0	1	0	1	0	18362358	-	-
55028	HLC-8	0	1	0	1	0	18362358	-	-
839	CASP6	0	1	0	1	0	18056640	-	-
54490	UGT2B28	0	1	0	1	0	18056640	-	-
11311	VPS45A	0	1	0	1	0	18362358	-	-
54537	FAM35A	1	1	0	1	0	15685193	-	-
10608	MXD4	1	1	0	1	0	15685193	-	-
4121	MAN1A1	0	1	0	1	0	18056640	-	-
54956	PARP16	1	1	0	1	0	15685193	-	-
22900	CARD8	0	1	0	1	0	18362358	-	-
56650	C3orf4	1	1	0	1	0	15685193	-	-
10559	SLC35A1	0	1	0	1	0	18362358	-	-
7003	TEAD1	1	1	0	1	0	15685193	-	-
57217	TTC7A	1	1	0	1	0	15685193	-	-
23052	KIAA0830	1	1	0	1	0	15685193	-	-
23075	SWAP70	1	1	0	1	0	15685193	-	-
840	CASP7	0	1	0	1	0	18056640	-	-
57574	KIAA1399	1	1	0	1	0	15685193	-	-
114882	OSBPL8	1	1	0	1	0	15685193	-	-
4782	NFIC	1	1	0	1	0	15685193	-	-
8985	PLOD3	1	1	0	1	0	15685193	-	-
127933	KIS	1	1	0	1	0	15685193	-	-
196	AHR	1	1	0	1	0	15685193	-	-
2040	STOM	1	1	0	1	0	15685193	-	-
65986	ZBTB10	1	0	1	0	0	18006846	-	-
27249	C2ORF25	0	1	1	0	0	18042700	-	-
4893	NRAS	1	1	1	0	0	15766527	-	-
4774	NFI-A	1	1	1	0	0	16325577	17260024	18056638
7114	TMSB4X	1	0	1	0	0	15951802	-	-
5228	PGF	0	1	1	0	0	18042700	-	-
25824	PRDX6	0	1	1	0	0	17980029	-	-
226	AldolaseA	0	1	1	0	0	18073344	-	-
861	AML1	0	1	1	0	0	17589498	-	-
8209	Hes1	1	1	1	0	0	12808467	15066185	-
26524	LATS2	1	1	1	0	0	16564011	18155131	-
3146	hmgb1	0	1	1	0	0	17637574	-	-
571	BACH-1	0	1	1	0	0	17881434	-	-
285908	LOC285908	0	1	1	0	0	18042700	-	-
7082	ZO-1	0	1	1	0	0	18162065	-	-
3207	HOXA11	0	1	1	0	0	16489342	-	-
10461	MERTK	0	1	1	0	0	18185580	-	-
55225	raver2	1	1	1	0	0	16549876	17637574	-
7398	USP1	1	0	1	0	0	15806104	-	-
5598	ERK5	1	1	1	0	0	17892514	15504739	17504027
29116	MYLIP	1	0	1	0	0	17575136	-	-
23261	CAMTA1	1	1	1	0	0	18189265	-	-
26135	serbp1	0	1	1	0	0	17637574	-	-
4602	MYB	1	0	1	0	0	17923094	-	-
9295	SFRS11	1	1	1	0	0	17322061	-	-
1876	E2F6	0	1	1	0	0	18381414	-	-
627	BDNF	1	1	1	0	0	14697198	-	-
993	CDC25A	0	1	1	0	0	17699775	18026111	-
79969	FLJ13158	1	1	1	0	0	15131085	-	-
51742	ARID4B	1	0	1	0	0	17575136	-	-
9782	MATR3	1	1	1	0	0	17881434	-	-
3667	IRS-1	1	1	1	0	0	17827156	18483236	-
8202	NCOA3	1	0	1	0	0	16940181	-	-
1278	COL1A2	1	1	1	0	0	18390668	-	-
5309	Pitx3	0	1	1	0	0	17761882	-	-
221823	PRPS1	1	0	1	0	0	17322061	-	-
3224	HOXC8	1	1	1	0	0	15105502	-	-
140578	CHODL	0	1	1	0	0	18042700	-	-
3303	HSP70	0	1	1	0	0	17715156	-	-
4223	GAX	1	1	1	0	0	17957028	-	-
595	CCND1	1	1	1	0	0	18379589	18406353	18483394
23011	RAB21	0	1	1	0	0	18362358	-	-
6996	TDG	1	1	1	0	0	18390668	-	-
6863	Tac1	1	1	1	0	0	17855557	-	-
6421	sfpq	0	1	1	0	0	17637574	-	-
1871	E2F3	1	1	1	0	0	17297439	-	-
8660	IRS-2	0	1	1	0	0	18483236	-	-
8243	SMC1L1	1	1	1	0	0	15131085	-	-
9575	Clock	0	1	1	0	0	15131085	-	-
6300	MAPK12	1	0	1	0	0	15504739	-	-
8091	HMGA2	1	1	1	0	0	18413726	17222355	17437991
23621	BACE1	1	1	1	0	0	18434550	18234899	-
5324	PLAG1	1	1	1	0	0	16461460	-	-
3218	HOXB8	1	1	1	0	0	15105502	17150553	-
7042	TGFbeta2	0	1	1	0	0	18483486	-	-
29851	ICOS	0	1	1	0	0	18172933	-	-
2146	ENX-1	1	1	1	0	0	14697198	18281287	-
2079	ERH	0	1	1	0	0	18042700	-	-
678	ZFP36L2	0	1	1	0	0	18042700	-	-
605	BCL7A	0	1	1	0	0	18026111	-	-
4811	NID1	0	1	1	0	0	18042700	-	-
2078	ERG	1	0	1	0	0	17344217	-	-
5992	RFX4	0	1	1	0	0	17553428	-	-
84061	NM_032121	1	0	1	0	0	16549876	-	-
51726	dnajb11	0	1	1	0	0	17637574	-	-
28514	Delta1	1	1	1	0	0	14697198	-	-
4286	Mitf	0	1	1	0	0	17597072	-	-
7099	TLR4	0	1	1	0	0	17660297	-	-
399979	SNX19	1	0	1	0	0	17322061	-	-
136319	MTPN	1	0	1	0	0	15806104	15538371	-
6670	Sp3	0	1	1	0	0	18006846	-	-
7422	VEGF	0	1	1	0	0	15131085	18320040	-
3757	HERG	0	1	1	0	0	17344217	-	-
4772	NFATC1	0	1	1	0	0	18042700	-	-
11167	FSTL1	1	0	1	0	0	17030984	-	-
92714	ARRDC1	0	1	1	0	0	18042700	-	-
5587	PRKD1	0	1	1	0	0	18042700	-	-
3958	Galectin-3	0	1	1	0	0	17889671	-	-
708	C1QBP	1	0	1	0	0	15806104	-	-
5925	RB1	1	1	1	0	0	16461460	-	-
112	Adcy6	0	1	1	0	0	17597072	-	-
4613	MYCN	1	1	1	0	0	14697198	18504438	-
10970	p63	0	1	1	0	0	18483491	-	-
1944	Ephrin-A3	1	1	1	0	0	18417479	-	-
9935	MAFB	1	1	1	0	0	16549775	-	-
3845	KRAS	1	1	1	0	0	15766527	-	-
79152	FA2H	0	1	1	0	0	18042700	-	-
1435	MCSF	1	1	1	0	0	14697198	-	-
2099	ESR1	1	1	1	0	0	17312270	18347104	-
3234	HOXD8	1	1	1	0	0	15105502	-	-
57048	PLSCR3	0	1	1	0	0	18042700	-	-
1284	COL4A2	1	1	1	0	0	18390668	-	-
4771	NF2	1	1	1	0	0	17220301	-	-
2064	ERBB2	1	1	1	0	0	17110380	-	-
4916	trkC	0	1	1	0	0	17483472	-	-
10021	HCN4	1	1	1	0	0	18458081	-	-
3551	IKKB	0	1	1	0	0	18408758	-	-
604	BCL6	1	1	1	0	0	16766263	-	-
5458	Brn-3b	1	1	1	0	0	14697198	-	-
610	HCN2	1	1	1	0	0	18458081	-	-
4088	SMAD3	1	0	1	0	0	16738545	-	-
131405	TRIM71	1	1	1	0	0	17890240	-	-
23641	LDOC1	1	1	1	0	0	17881434	-	-
659	BMPRII	0	1	1	0	0	17991735	-	-
1326	MAP3K8	1	1	1	0	0	17621267	-	-
130557	ZNF513	1	0	1	0	0	17322061	-	-
2891	GRIA2	1	1	1	0	0	18184693	-	-
51673	CGI-38	1	1	1	0	0	15131085	-	-
3914	LAMB3	0	1	1	0	0	17998940	-	-
6678	SPARC	1	1	1	0	0	18390668	-	-
960	CD44	0	1	1	0	0	18193036	-	-
2959	GTF2b	0	1	1	0	0	18073344	-	-
85414	prostein	1	1	1	0	0	18193184	-	-
5465	PPARA	0	1	1	0	0	18347104	-	-
8539	API-5	1	1	1	0	0	18319255	-	-
5225	PGC	1	0	1	0	0	16260724	-	-
5063	CDKN1A	1	0	1	0	0	17991735	-	-
2200	fibrillin1	0	1	1	0	0	18390668	-	-
1869	E2F-1	1	1	1	0	0	15944709	18025036	-
10772	FUSIP1	1	1	1	0	0	18390668	-	-
6847	SYCP1	1	0	1	0	0	17403776	-	-
842	Casp9	0	1	1	0	0	17715156	-	-
7447	VSNL1	1	1	1	0	0	18184693	-	-
1306	COL15A1	1	1	1	0	0	18390668	-	-
1028	CDKN1C	1	1	1	0	0	18413744	18521080	-
94241	TP53INP1	1	0	1	0	0	17911264	-	-
79602	ADIPOR2	1	0	1	0	0	15806104	-	-
7048	TGFBR2	1	1	1	0	0	16461460	-	-
1281	COL3A1	1	1	1	0	0	18390668	-	-
4609	c-MYC	0	1	1	0	0	17877811	-	-
7272	TTK	1	1	1	0	0	17322061	-	-
5315	PKM2	1	1	1	0	0	18464261	-	-
4781	NFIB	0	1	1	0	0	18384814	-	-
1029	p16	1	1	1	0	0	18365017	-	-
1788	DNMT3A	1	1	1	0	0	17890317	-	-
83990	BACH1	1	0	1	0	0	17881434	-	-
84923	FAM104A	0	1	1	0	0	18042700	-	-
114798	SLITRK1	1	1	1	0	0	16224024	-	-
23054	HOXA7	1	1	1	0	0	15105502	-	-
1027	p27	1	1	1	0	0	17569667	17721077	18413744
1282	COL4A1	0	1	1	0	0	18390668	-	-
3815	KIT	1	1	1	0	0	16330772	-	-
1277	COL1A1	1	1	1	0	0	18390668	-	-
91	ALK4	1	1	1	0	0	17906079	-	-
7402	UTRN	1	0	1	0	0	17030984	-	-
9088	MYT1	1	0	1	0	0	18006846	-	-
6671	Sp4	0	1	1	0	0	18006846	-	-
9759	HDAC4	1	1	1	0	0	16380711	16828749	-
8115	Tcl1	1	1	1	0	0	17178851	-	-
9839	SIP1	1	1	1	0	0	18376396	-	-
79668	FLJ21308	1	1	1	0	0	15131085	-	-
152789	JAKMIP1	0	1	1	0	0	18042700	-	-
5728	PTEN	1	1	1	0	0	14697198	16762633	17681183
2065	ERBB3	1	1	1	0	0	17110380	-	-
10499	NCOA2/TIF2	0	1	1	0	0	18381414	-	-
4851	Notch1	1	1	1	0	0	17150773	14697198	-
79727	Lin28	1	1	1	0	0	15131085	16227573	18230348
3784	KCNQ1	1	1	1	0	0	17443681	-	-
5747	PTK2/FAK	0	1	1	0	0	18381414	-	-
3198	HOXA1	1	1	1	0	0	16549775	-	-
7015	TERT	1	0	1	0	0	18201269	-	-
23291	FBXW1B	1	1	1	0	0	15131085	-	-
1789	DNMT3B	1	1	1	0	0	18367714	17890317	-
6935	ZEB1	1	1	1	0	0	18411277	18381893	18376396
3753	KCNE1	1	1	1	0	0	17443681	-	-
6659	SOX4	0	1	1	0	0	18185580	-	-
65981	C1QDC1	0	1	1	0	0	18042700	-	-
51684	Sufu	1	1	1	0	0	18077375	-	-
7412	VCAM-1	1	1	1	0	0	18227515	-	-
3918	LAMC2	1	1	1	0	0	15131085	-	-
8856	PXR	0	1	1	0	0	18268015	-	-
9988	DMTF1	1	1	1	0	0	15131085	-	-
123228	SENP8	0	1	1	0	0	18042700	-	-
9429	ABCG2	1	1	1	0	0	18189265	-	-
23239	SCOP	0	1	1	0	0	17553428	-	-
596	BCL2	0	1	1	0	0	16166262	18449891	17656095
5799	PTPRN2	0	1	1	0	0	18185580	-	-
192669	EIF2C3	1	1	1	0	0	18189265	-	-
3236	HOXD10	1	1	1	0	0	17898713	-	-
3351	HTR1B	0	1	1	0	0	18283276	-	-
1875	E2F5	0	1	1	0	0	18042700	-	-
9464	Hand2	1	0	1	0	0	15951802	-	-
2697	CX43	1	1	1	0	0	17062625	17401374	18155131
55503	TRPV6	1	0	1	0	0	17179747	-	-
23705	IGSF4	0	1	1	0	0	18362358	-	-
9021	SOCS-3	0	1	1	0	0	17622355	-	-
6836	SURF4	1	0	1	0	0	16549876	-	-
6722	SRF	1	0	1	0	0	16380711	-	-
23555	TSPAN15	0	1	1	0	0	18042700	-	-
53346	TM6SF1	1	1	1	0	0	17881434	-	-
388015	Rtl1/Peg11	1	0	1	0	0	15854907	-	-
116833	AIB1	0	1	1	0	0	16940181	-	-
3717	JAK2	1	0	1	0	0	15806104	-	-
6387	SDF-1	1	1	1	0	0	14697198	-	-
3329	HSP60	0	1	1	0	0	17715156	-	-
7040	TGFB1	1	0	1	0	0	16738545	-	-
60481	ELOVL5	1	0	1	0	0	16549876	-	-
3759	KCNJ2	1	1	1	0	0	17401374	-	-
117584	RFFL	0	1	1	0	0	18042700	-	-
900	cyclinG1	1	1	1	0	0	17616664	-	-
473	RERE	0	1	1	0	0	17923093	-	-
185	AGTR1	0	1	1	0	0	16675453	17588946	17668390
26281	FGF20	1	1	1	0	0	18252210	-	-
3202	HOXA5	1	1	1	0	0	17957028	14697198	-
1719	DHFR	1	1	1	0	0	17686970	-	-
