# Supplementary material for: Modification of Gene Duplicability during the Evolution of Protein Interaction Network
Source: PLoS Comput Biol. 2011 Apr 7;7(4):e1002029. doi: 10.1371/journal.pcbi.1002029 (PMC3072358; doi:10.1371/journal.pcbi.1002029)
Supplement: Table S8 — Gene expression data. The number of tissues includes all non-cancer tissues from the original analyses by Ge [68] and Su [69]. The intersection with the 18,074 genes that have origin and duplicability information is also indicated. (XLS) [file pcbi.1002029.s012.xls]

## Sheet: Table S8
Table S8: Gene expression data
Legend: The number of tissues includes all non-cancer tissues from the original analyses by Ge [1] and Su [2]. The intersection with the 18,074 genes that have origin and duplicability information is also indicated
Experiment	N tissues	N samples	Type	N probes	N genes	genes in our dataset
Su et al. 2004	73	146	Total	22283	13787	1006
			tissue-selective	6308	4241	3622
			housekeeping	4493	3750	3319
Ge et al. 2005	36	36	Total	22283	13787	10060
			tissue-selective	2876	2514	2192
			housekeeping	1759	1532	1321
Total	109	182	Total	22283	13787	10060
			tissue-selective	NA	4988	4616
			housekeeping	NA	3765	3500
References:
1. Ge X, Yamamoto S, Tsutsumi S, Midorikawa Y, Ihara S, et al. (2005) Interpreting expression profiles of cancers by genome-wide survey of breadth of expression in normal tissues. Genomics 86: 127-141. 2. Su AI, Wiltshire T, Batalov S, Lapp H, Ching KA, et al. (2004) A gene atlas of the mouse and human protein-encoding transcriptomes. Proc Natl Acad Sci U S A 101: 6062-6067.
