# Supplementary material for: Modification of Gene Duplicability during the Evolution of Protein Interaction Network
Source: PLoS Comput Biol. 2011 Apr 7;7(4):e1002029. doi: 10.1371/journal.pcbi.1002029 (PMC3072358; doi:10.1371/journal.pcbi.1002029)
Supplement: Table S9 — Dosage regulation of human hubs. For each evolutionary time point, the fraction of singleton and duplicated hubs that are also ohnologs, miRNA targets or encoded by tissue-selective genes is compared. Opisthokonts are grouped with eukaryotes and primates with mammals because the number of hubs that originated with opisthokonts and primates is too low to make any statistical analysis. * total duplicated hubs; ** total singleton hubs. (XLS) [file pcbi.1002029.s013.xls]

## Sheet: Table S9
Table S9: Dosage regulation of human hubs
Legend: For each evolutionary time point, the fraction of singleton and duplicated hubs that are also ohnologs, miRNA targets or encoded by tissue-selective genes is compared. Opisthokonts are grouped with eukaryotes and primates with mammals because the number of hubs that originated with opisthokonts and primates is too low to make any statistical analysis. * = total duplicated hubs; ** = total…
	All three (Fig.5A)				Ohnologs (Fig.5B)						miRNA targets (Fig.5C)				Tissue-selective genes (Fig.5D)				Total Hubs
Origin	Duplicated Hubs	% total*	Singleton Hubs	% total**	Ohnologs	% total*	Small-scale duplications	% total*	Singleton Hubs	% total**	Duplicated Hubs	% total*	Singleton Hubs	% total**	Duplicated Hubs	% total*	Singleton Hubs	% total**	Duplicated	Singletons
LUCA	391	57.4156	57	25.2212	253	37.1512	138	32.243	57	25.2212	68	9.98532	17	7.52212	171	25.1101	43	19.0265	681	226
Euk+Opi	426	58.7586	68	28.3333	288	39.7241	138	31.5789	68	28.3333	72	9.93103	21	8.75	183	25.2414	50	20.8333	725	240
Metazoans	205	73.4767	48	38.4	153	54.8387	52	41.2698	48	38.4	31	11.1111	12	9.6	88	31.5412	37	29.6	279	125
Vertebrates	133	70.3704	70	38.674	68	35.9788	65	53.719	70	38.674	20	10.582	11	6.07735	78	41.2698	59	32.5967	189	181
Mam+Pri	12	40	20	37.7358	NA	NA	12	40	20	37.7358	2	6.66667	3	5.66038	10	33.3333	18	33.9623	30	53
